# Supplementary material for: Hypertensive pregnancy complications in women with epilepsy and antiepileptic drugs: a population-based cohort study of first pregnancies in Norway
Source: PubMed Central journal article supplement — BMJ Open. 2018 Apr 24;8(4):e020998. doi: 10.1136/bmjopen-2017-020998 (PMC5922520; doi:10.1136/bmjopen-2017-020998), 2018-04-24
Supplement: bmjopen-2017-020998.draft_revisions.pdf [file bmjopen-2017-020998.draft_revisions.pdf]

# BMJ Open

BMJ Open is committed to open peer review. As part of this commitment we make the peer review history of every article we publish publicly available.

When an article is published we post the peer reviewers' comments and the authors' responses online. We also post the versions of the paper that were used during peer review. These are the versions that the peer review comments apply to.

The versions of the paper that follow are the versions that were submitted during the peer review process. They are not the versions of record or the final published versions. They should not be cited or distributed as the published version of this manuscript.

BMJ Open is an open access journal and the full, final, typeset and author-corrected version of record of the manuscript is available on our site with no access controls, subscription charges or pay-per-view fees (<http://bmjopen.bmj.com>).

If you have any questions on BMJ Open's open peer review process please email [info.bmjopen@bmj.com](mailto:info.bmjopen@bmj.com)

# BMJ Open

## Hypertensive pregnancy complications in women with epilepsy and antiepileptic drugs: a population-based study of first pregnancies

|                               |                                                                                                                                                                                                                                                                                                                                                                                                                                                                                                                                                                                                   |
|-------------------------------|---------------------------------------------------------------------------------------------------------------------------------------------------------------------------------------------------------------------------------------------------------------------------------------------------------------------------------------------------------------------------------------------------------------------------------------------------------------------------------------------------------------------------------------------------------------------------------------------------|
| Journal:                      | <i>BMJ Open</i>                                                                                                                                                                                                                                                                                                                                                                                                                                                                                                                                                                                   |
| Manuscript ID                 | bmjopen-2017-020998                                                                                                                                                                                                                                                                                                                                                                                                                                                                                                                                                                               |
| Article Type:                 | Research                                                                                                                                                                                                                                                                                                                                                                                                                                                                                                                                                                                          |
| Date Submitted by the Author: | 06-Dec-2017                                                                                                                                                                                                                                                                                                                                                                                                                                                                                                                                                                                       |
| Complete List of Authors:     | Danielsson, Kim; Haukeland University Hospital, Department of Obstetrics and Gynecology; University of Bergen, Faculty of Medicine, Department of Clinical Medicine<br>Borthen, Ingrid; University of Bergen, Faculty of Medicine, Department of Clinical Medicine<br>Morken, Nils-Halvdan; University of Bergen, Faculty of Medicine, Department of Clinical Science; Haukeland University Hospital, Department of Obstetrics and Gynecology<br>Gilhus, Nils; University of Bergen, Faculty of Medicine, Department of Clinical Medicine; Haukeland University Hospital, Department of Neurology |
| Keywords:                     | Epilepsy < NEUROLOGY, Pregnancy, Antiepileptic drugs, Hypertensive disorder, Preeclampsia, Medical Birth Registry of Norway                                                                                                                                                                                                                                                                                                                                                                                                                                                                       |
|                               |                                                                                                                                                                                                                                                                                                                                                                                                                                                                                                                                                                                                   |

SCHOLARONE™  
Manuscripts

Hypertensive pregnancy complications in women with epilepsy

# Hypertensive pregnancy complications in women with epilepsy and antiepileptic drugs: a population-based study of first pregnancies

---

**Kim Christian Danielsson, MD** <sup>a,b</sup>

**Ingrid Borthen, MD, PhD** <sup>b</sup>

**Nils-Halvdan Morken, MD, PhD** <sup>a,c</sup>

**Nils Erik Gilhus, MD, PhD** <sup>b,d</sup>

<sup>a</sup> Department of Obstetrics and Gynecology, Haukeland University Hospital, Bergen, Norway.

<sup>b</sup> Department of Clinical Medicine, University of Bergen, Norway.

<sup>c</sup> Department of Clinical Science, University of Bergen

<sup>d</sup> Department of Neurology, Haukeland University Hospital, Bergen, Norway.

Corresponding author:

Kim Christian Danielsson:

Department of Obstetrics and Gynecology,

Haukeland University Hospital,

Postboks 1400

5021 Bergen, Norway.

E-mail: [kim.christian.danielsson@helse-bergen.no](mailto:kim.christian.danielsson@helse-bergen.no)

Mobilephone: +47 95761169

Telefax: +47 55974968

Short title:

Hypertensive pregnancy complications in women with epilepsy

Word count: 3093

Tables: 3

## Hypertensive pregnancy complications in women with epilepsy

### **Abstract**

#### **Objectives:**

To estimate the risk of hypertensive pregnancy complications in women with epilepsy, with and without antiepileptic drugs, and assess the risk associated with the four most common antiepileptic drugs.

#### **Design:**

A population-based cohort study using linked data from the Medical Birth Registry of Norway and the Norwegian Prescription Database. Women with epilepsy with and without antiepileptic drugs were compared to women without epilepsy.

#### **Setting:**

Norway, 2004-2012.

#### **Participants:**

All first pregnancies of women with epilepsy and women without epilepsy were included.

#### **Primary and secondary outcome measures:**

Main outcome measures were hypertensive pregnancy complications: a compound variable of any hypertensive disorder, gestational hypertension, mild preeclampsia, severe preeclampsia, early onset preeclampsia, eclampsia, and HELLP syndrome.

#### **Results:**

In total 1778 pregnancies in women with epilepsy and 221 662 in women without epilepsy were analysed. 682 of the women with epilepsy used antiepileptic drugs, the most common in monotherapy being: lamotrigine (N=280), carbamazepine (N=94), levetiracetam (N=71), and valproate (N=51). There was an increased risk of any hypertensive disorder in women with epilepsy (adjusted odds ratio [aOR]: 1.2, 95% CI 1.0-1.5) and in the subcategory using valproate (aOR: 2.9: 95% CI: 1.3-6.4). The most frequent hypertensive complication was mild

Hypertensive pregnancy complications in women with epilepsy

preeclampsia and the risk was increased in women with epilepsy (aOR: 1.4, 95% CI: 1.1-1.8) and women with epilepsy with valproat (aOR: 3.3: 95% CI: 1.2-9.4).

### **Conclusions:**

Women with epilepsy have an increased risk of mild preeclampsia, but not for the severe types of hypertensive pregnancy complications. Lamotrigine and levetiracetam do not predispose for mild preeclampsia, whereas valproate was associated with an increased risk of mild preeclampsia.

### **Strengths and limitations of this study:**

- + Large population based national cohort with data from compulsory and reliable national health registries
- + Only first pregnancies were included to avoid bias from recurrent events
- + This is the first study to specify type and degree of Hypertensive complications
- We had no data on type of epilepsy or seizure activity

### **Funding**

This research was kindly supported by the Fund of Torbjørg Hauge's Legacy.

### **Competing interests:**

None of the authors have any conflict of interest to disclose.

## Hypertensive pregnancy complications in women with epilepsy

### Introduction

Epilepsy is the most common neurologic disorder requiring continuous drug treatment during pregnancy, and 30 - 70% of pregnant women with epilepsy (WWE) use antiepileptic drugs (AEDs).<sup>(1-4)</sup> Consequences of maternal AED use during pregnancy for fetal malformations and early childhood development have been focused.<sup>(5-8)</sup> In contrast, potential effects of epilepsy and specific AEDs on the pregnancy have been less studied. Optimal therapy in epilepsy is a balance between seizure suppression and side-effects. For women in fertile age, potential AED effects for the fetus as well as on the pregnancy should be of the highest relevance.

Hypertensive pregnancy complications include multiple diagnoses with different risks and implications for fetal and maternal outcomes. Hypertensive pregnancy complications represent a major contributor to global maternal mortality.<sup>(9)</sup> Most previous studies, including a recent meta-analysis, have found an increased risk of total hypertensive complications in WWE but these studies have not differentiated between the specific hypertensive disorders and therefore the burden of disease in WWE is uncertain.<sup>(10-14)</sup> (2, 3, 10, 13, 14) Studies on the effect of specific AEDs on pregnant women with epilepsy have been limited by small sample size, selection bias, and lack of detailed information on hypertensive disorders.<sup>(2, 3, 10, 12-14)</sup> Preferred drugs and drugs to be avoided have not been identified.

The aim of the present study was to estimate the risk of specified hypertensive pregnancy complications in WWE with and without use of AEDs, and to specifically define the risk for the four most common AEDs. This is necessary to guide optimal AED treatment in young women before and during pregnancy.

Hypertensive pregnancy complications in women with epilepsy

### Materials and Methods

We used data from the compulsory, population-based Medical Birth Registry of Norway (MBRN) collected during 2004-2012. The notification form of the MBRN was unchanged in that period. MBRN includes data on maternal and paternal social factors, maternal health prior to and during pregnancy including chronic diseases such as epilepsy, complications and interventions during pregnancy and birth, perinatal outcome and complications in the children. Data are prospectively registered throughout pregnancy, delivery and postpartum period. All data are forwarded to the MBRN by the attending midwife or obstetrician. All pregnancies from 12 weeks gestation are recorded. The registry is routinely linked to the National Population Database to ensure notification of all births and deaths in the country. All Norwegian citizens are given a unique Social Security Number that enables linkage of data from various national data sources. Only first time pregnancies were included in this study, all singleton and multiple pregnancies at >22 weeks of gestation.

The Norwegian Prescription Database (NorPD), commenced in 2004, provides detailed data on all medications dispensed from pharmacies by prescription. Mandatory registration in NorPD of every dispensed medical prescription is made by the pharmacist. Statistics Norway provided data on maternal level of education.

Main outcome variables were a compound variable of any hypertensive disorder in pregnancy, gestational hypertension, mild preeclampsia, severe preeclampsia, early onset preeclampsia, eclampsia, and HELLP syndrome (Haemolysis, Elevated Liver enzymes, Low Platelets). Exposure variables were a diagnosis of epilepsy and use of AEDs. All hypertensive disorders, except the compound variable, are reported in MBRN in specified checkboxes. Gestational hypertension was defined as persisting elevated blood pressure  $\geq 140$  mmHg systolic and/or  $\geq 90$  mmHg diastolic occurring after 20 weeks of gestation and without pre-existing hypertension.<sup>(15)</sup> Mild preeclampsia was defined as persisting elevated blood pressure

## Hypertensive pregnancy complications in women with epilepsy

1  
2  
3  $\geq 140$  mmHg systolic and/or  $\geq 90$  mmHg diastolic combined with proteinuria  $\geq 0,3$ g per 24  
4  
5 hours (equivalent to  $\geq +1$  on urine test strips for protein excretion) occurring after 20 weeks of  
6  
7 gestation. Severe preeclampsia was defined as blood pressure  $\geq 160/110$  mmHg, clinical  
8  
9 symptoms of preeclampsia, protein excretion  $\geq 3$  g per 24 hours or oliguria, early onset  
10  
11 preeclampsia, eclampsia or HELLP syndrome. Eclampsia was defined as generalized seizures  
12  
13 occurring simultaneously with preeclampsia or hypertension and without other cause. Early  
14  
15 onset preeclampsia was defined as preeclampsia with onset before 34 weeks of gestation. The  
16  
17 compound variable of any hypertensive disorder was defined as the presence of any of these  
18  
19 hypertensive disorders. Superimposed preeclampsia in women with pre-gestational  
20  
21 hypertension was not specified but was included in the respective subcategories of  
22  
23 hypertensive complications by severity.  
24  
25

26  
27 Maternal epilepsy was defined by either ticking the specific checkbox in MBRN or adding  
28  
29 this diagnosis in a blank space available for written text. Neither of these provided  
30  
31 information about the type of epilepsy or seizure activity. The diagnosis was based on  
32  
33 previous medical history and medical charts. The epilepsy diagnosis in MBRN has previously  
34  
35 been found to be valid in 92.3 % of cases.<sup>(3)</sup>  
36

37  
38 NorPD provided exact data on dispensed AEDs and high-dose folic acid supplementation  
39  
40 (4mg/day) including type of medication (according to ATC codes), dose, and time of  
41  
42 administration. We defined AED use in pregnancy as dispensed drugs from the pharmacy in  
43  
44 the time period coinciding with gestation, dated by ultrasound assessment. In cases with  
45  
46 missing ultrasound dates, last menstrual period was used. We assessed drug dispensation also  
47  
48 one and three months pre-conception. An a priori decision was made to primarily analyse the  
49  
50 four most commonly used AEDs in monotherapy in order to obtain large enough groups and  
51  
52 exclude interference of polytherapy. Information about AED use in pregnancy is also  
53  
54  
55  
56  
57  
58  
59  
60



## Hypertensive pregnancy complications in women with epilepsy

recorded in MBRN on the notification form in an available blank space for written text. This information was used to validate the AED use obtained from MBRN compared to NorPD. Socio-demographic and background data included maternal age ( $\leq 19$  years, 20-24 years, 25-29 years, 30-34 years, 35-39 years and  $\geq 40$  years), maternal educational level ( $\leq 10$  years, 11-13 years,  $\geq 14$  years), other chronic disease (kidney disease, hypertension, diabetes mellitus), multifetal pregnancies, high pre-gestational body mass index (BMI) ( $\text{BMI} \geq 30 \text{kg/m}^2$ ), smoking during pregnancy, and use of folic acid supplementation in standard dose (0,4mg/day). The BMI variable was only available from 2006 onwards. Data on ethnicity and marital status were not available for this study.

We further categorized WWE by AED-treatment; all AEDs, no AEDs, AED polytherapy, and the four most common AEDs. Outcome variables for specific AEDs were analysed only in WWE with monotherapy. WWE using other than the four most common AEDs were identified and excluded from the analyses where appropriate. WWE and all treatment subcategories were compared with women without epilepsy. WWE with AED treatment were also compared to WWE without AEDs.

For binary outcomes, proportions and crude odds ratios (OR) were calculated using contingency tables. P-values were calculated using Fisher's exact test. Continuous variables (background variables) were analysed with independent sample t-tests. Statistical significance was defined as non-overlapping 95% confidence intervals (95% CI) and two sided p-values  $< 0.05$ . All statistical analyses were performed with IBM SPSS (Statistical Package for Social Sciences) version 22.0 or later.

We used logistic regression to adjust for possible confounding by maternal age, educational level, multifetal pregnancy, use of folic acid supplements, and other relevant chronic diseases (pre-existing hypertension, pre-existing kidney disease, and pre-existing diabetes mellitus).

The covariates BMI (only registered since 2006) and smoking were restrained by missing

Hypertensive pregnancy complications in women with epilepsy

cases and therefore studied with sensitivity analyses applied on all results and not included in the final logistic regression models. The impact of other relevant chronic diseases was also analysed further with sensitivity analyses.

This study was approved by the Regional Ethics Committee (REK 2013/186) and the Norwegian Data Protection Authority. The MBRN, NorPD and Statistics Norway approved the use of data. Use of Norwegian national register data does not require consent from the participants.

For peer review only

## Hypertensive pregnancy complications in women with epilepsy

**Results**

223 440 first time pregnancies were eligible after exclusion of multipara pregnancies (309 364), missing personal identification number (1 514, 0.7% [foreigners or immigrants without residence permit]), and pregnancies <23 gestational weeks (340, 0.2%). There were 1778 WWE (0.79 %), of whom 682 (38.4 % of WWE) used AEDs either in monotherapy (554 women) or in polytherapy (128 women). The most common AEDs used as monotherapy were lamotrigine (280 women, 50.5 % of all monotherapies), carbamazepine (94 women, 17.0 %), levetiracetam (71 women, 12.8 %), and valproate (51 women, 9.2 %). Other AEDs in monotherapy were used by 58 WWE. Maternal characteristics are shown in Table 1.

The adjusted odds ratio (aOR) of the compound variable any hypertensive complication, was increased in WWE (aOR 1.2, 95% CI: 1.0-1.5) compared to women without epilepsy. When WWE were subcategorized into WWE with AED and WWE without AED, none of the two subgroups differed significantly from women without epilepsy for any hypertensive disorder. The majority of hypertensive complications were mild preeclampsia (Table 2). The risk of mild preeclampsia was significantly increased in WWE (aOR: 1.4, 95% CI: 1.1-1.8) and in WWE without AED exposure (aOR: 1.4, 95% CI: 1.0-2.0) compared to women without epilepsy. For WWE with AED the risk of mild preeclampsia was not significantly increased although the prevalence was the same as for both WWE and WWE without AEDs. For WWE there was a marginally significant risk of early onset preeclampsia (aOR: 1.7, 95% CI: 1.0-2.8). This risk disappeared after stratification and when including smoking in sensitivity analyses. Mild preeclampsia was therefore the only specified hypertensive disorder increased in WWE. There was no significant difference for any of the outcomes when WWE with AEDs were compared to WWE without AED. There was no significantly increased risk of gestational hypertension, severe preeclampsia, HELLP or eclampsia when WWE, WWE with and WWE without AED were compared to women without epilepsy.

## Hypertensive pregnancy complications in women with epilepsy

WWE with valproate monotherapy had an increased risk of any hypertensive complication (aOR: 2.9, 95% CI: 1.4-6.4), gestational hypertension (aOR: 3.3, 95% CI: 1.0-10.8), and mild preeclampsia (aOR: 3.3, 95% CI: 1.2-9.4) compared to women without epilepsy (Table 3).

There was no increased risk of hypertensive complications for any other AEDs used in monotherapy.

Sensitivity analyses for smoking included 182 478 women, and modified the results for early onset preeclampsia in WWE compared to women without epilepsy (aOR: 1.6, 95% CI: 0.9-2.9). Sensitivity analyses for BMI >30kg/m<sup>2</sup> included 60 740 women and modified the risk for any hypertensive disorder for WWE (aOR: 1.3, 95% CI: 0.8-1.9), while the risk of mild preeclampsia increased (aOR: 1.8, 95% CI: 1.1-2.9). All increased risks for WWE with VPA disappeared when sensitivity analyses with BMI > 30kg/m<sup>2</sup> was performed. Separate analyses of women with BMI >30kg/m<sup>2</sup> only, showed no significant differences for any of the outcome variables when WWE, WWE with AED, and WWE without AED were compared to women without epilepsy. BMI > 30kg/m<sup>2</sup> and other relevant chronic diseases had no significant interactions with epilepsy in Logistic regression analyses. However these variables had more impact on all hypertensive outcomes than a diagnosis of epilepsy. The impact of standard folic acid and of high-dose folic acid supplementation was examined in all population subcategories. There were no significant differences among WWE for any of the hypertensive outcomes between use and no use of such supplementations.

To validate the AED data in MBRN, positive predictive values were calculated for matching AED dispensation in the NorPD data during pregnancy. Positive predictive value was 0.94 for lamotrigine, 0.82 for carbamazepine, 0.84 for valproate, and 0.95 for levetiracetam. When AED use in NorDP data was assessed one and three months before conception, the total AED population remained unchanged. 95% of WWE with AED in NorPD had more than one

Hypertensive pregnancy complications in women with epilepsy

dispensation during pregnancy, illustrating continuous use throughout pregnancy as one

dispensation usually corresponds to more than three months use.

For peer review only

## Hypertensive pregnancy complications in women with epilepsy

**Discussion**

We found an increased risk of mild preeclampsia in WWE and the hypertensive complications in WWE consisted mostly of cases with mild preeclampsia. The specified newer AEDs used in monotherapy did not predispose for this complication. WWE on valproate monotherapy was significantly associated with mild preeclampsia, in contrast to other AEDs. WWE, with and without AEDs, did not have an increased risk of gestational hypertension, severe preeclampsia, early onset preeclampsia, HELLP or eclampsia when compared to women without epilepsy.

The present study shows that most WWE, and in particular when treated with the new AEDs, do not have additional risks of hypertensive complications. WWE without AED seemed to have an increased risk of mild preeclampsia but this risk was no longer significant when sensitivity analyses including other relevant chronic diseases were applied. WWE with AED and WWE without AED had the same prevalence of mild preeclampsia but only WWE without AED had a significantly increased risk. This probably reflects marginal differences influenced by sample size. Collateral risk factors such as smoking, BMI >30kg/m<sup>2</sup>, and relevant chronic disease (pre-existing kidney disease, hypertension or diabetes) were relevant for hypertensive complications in WWE. The mechanism for the increased risk of hypertensive complications in WWE in first pregnancies could therefore be partly mediated by modifiable external risk factors and comorbidity.

The specific risk in WWE on valproate was linked to high BMI. Weight gain and metabolic syndrome represent side-effects of valproate.<sup>(16)</sup> Our study does not support any additional mechanism for valproate associated mild preeclampsia. When pregnancies with BMI > 30 kg/m<sup>2</sup> were analysed separately, WWE with valproate had a high prevalence of mild preeclampsia, but the increased risk was not significant, possibly due to few cases. A previous study showed increased risk of preeclampsia in women on valproate but this was not

## Hypertensive pregnancy complications in women with epilepsy

1  
2 confirmed by later studies.<sup>(3, 12, 13)</sup> Valproate can induce endocrine changes and polycystic  
3  
4 ovary syndrome in WWE and polycystic ovary syndrome is associated with hypertensive  
5  
6 pregnancy complications.<sup>(16-19)</sup> Polycystic ovary syndrome is also associated with overweight  
7  
8 so endocrine factors could be important for our findings. Valproate increases the risk of  
9  
10 malformations in children exposed during pregnancy.<sup>(6, 20)</sup> Because of this, as well as delayed  
11  
12 neurodevelopment, The European Medicines Agency has strengthened the advice not to  
13  
14 prescribe valproate to WWE in fertile age.<sup>(21)</sup> Valproate is therefore not first line treatment in  
15  
16 pregnancy. The observed valproate associated mild preeclampsia could represent bias through  
17  
18 confounding by indication, although we would expect valproate to be avoided in women  
19  
20 without other risk factors than epilepsy.  
21  
22

23  
24 The modern AEDs lamotrigine and levetiracetam were not associated with increased risk of  
25  
26 mild preeclampsia, and lamotrigine did not increase hypertensive pregnancy complications in  
27  
28 general. A small study has previously reported an increased risk of preeclampsia in WWE on  
29  
30 lamotrigine.<sup>(3)</sup> Lamotrigine has been considered a preferred option for WWE in need of AED  
31  
32 treatment because children exposed to lamotrigine in pregnancy have a lower rate of  
33  
34 malformations and better cognitive function than after exposure to other AEDs.<sup>(5, 6, 8)</sup> Potential  
35  
36 AED effects on the child are highly important for deciding optimal treatment for WWE. The  
37  
38 combination of a low rate of adverse fetal effects and no increased risk of hypertensive  
39  
40 complications supports the use of lamotrigine in WWE before and during pregnancy. We  
41  
42 found an increased risk of early onset preeclampsia in WWE on levetiracetam, but this should  
43  
44 be interpreted with caution as the association relayed on only two cases and was not present in  
45  
46 sensitivity analyses including BMI. Levetiracetam is a potent, broad-spectrum AED with low  
47  
48 rate of adverse fetal outcomes.<sup>(5)</sup> Levetiracetam use among pregnant WWE is increasing, but  
49  
50 levetiracetam is less studied than lamotrigine and maternal safety during pregnancy is not well  
51  
52 documented.<sup>(5, 6, 22)</sup>  
53  
54  
55  
56  
57  
58  
59  
60

## Hypertensive pregnancy complications in women with epilepsy

1  
2  
3 Mild, but not more severe preeclampsia was increased among WWE. Proactive management  
4 and close surveillance of WWE could explain why the mild disease did not proceed further.  
5  
6 Similarly, the close surveillance of WWE could have increased the detection of mild  
7  
8 preeclampsia. Alternatively, mild and severe hypertensive complications in pregnancies could  
9  
10 have different underlying pathophysiological mechanisms in WWE.  
11

12  
13 Strengths of our study are that we have analysed first pregnancies only, have specified the  
14  
15 types of hypertensive complications, and have analysed WWE on specific AEDs in  
16  
17 monotherapy only. Parity is a complex variable in reproductive epidemiology and may lead to  
18  
19 bias as the risk of hypertensive complications changes significantly in subsequent  
20  
21 pregnancies.<sup>(23-25)</sup> Our large and unselected nationwide cohort enabled assessment of effects  
22  
23 of individual AEDs in monotherapy. Data was linked to the NorPD that showed the exact  
24  
25 drug dispensation during pregnancy. The registration and standardized data collection in the  
26  
27 national databases that were used provide information of high validity.<sup>(3,26)</sup> The prevalence of  
28  
29 WWE in our population was 0.79 % and the incidence of preeclampsia was 5.4 %, both in  
30  
31 accordance with previous population-based studies.<sup>(1, 2, 4, 11, 27, 28)</sup>  
32  
33

34  
35 A limitation of this study was the possible inclusion of previous and non-active epilepsy, and  
36  
37 also of women with undefined seizures in the epilepsy group. This could have increased the  
38  
39 total epilepsy population and thereby masking some effects in our group with untreated  
40  
41 epilepsy. The MBRN did not provide data on type of epilepsy or seizure activity. However, a  
42  
43 small study did not find any association between seizure activity and hypertensive  
44  
45 complications in pregnancy.<sup>(3)</sup> Women without epilepsy but using AEDs for other conditions  
46  
47 were not excluded in our study. This group constituted 0.1 % in the control population and did  
48  
49 not affect the outcomes. Psychiatric and pain conditions are the main reasons for AED use in  
50  
51 women without epilepsy. NorPD records dispensed medications which may leave room for  
52  
53 variation in actual compliance. As 95% of WWE with AED collected more than one  
54  
55  
56  
57  
58  
59  
60



Hypertensive pregnancy complications in women with epilepsy

dispensation during their pregnancy, we presume that the patients used their AED as prescribed.

BMI above or below 30 kg/m<sup>2</sup> influenced the results for WWE. MBRN has only registered BMI since 2006, thus it was not possible to control for this variable in the complete population. One previous study has indicated an increased risk for preeclampsia in WWE with BMI > 25 kg/m<sup>2</sup>.<sup>(29)</sup> Regardless of a global rise in BMI, a risk factor for hypertensive disorders, preeclampsia shows a decreasing prevalence over time.<sup>(27,30)</sup> A general decrease in preeclampsia is most likely also affecting WWE and thereby possibly narrowing the differences between WWE and women without epilepsy.

HELLP, eclampsia and early onset preeclampsia are rare hypertensive manifestations. Lack of events in some of our subgroups can be insufficient to prove significance, despite our large sample size. Our study lacks information on ethnicity and marital status, not released by MBRN due to ethical considerations.

Hypertensive pregnancy complications in women with epilepsy

## Conclusion

Mild preeclampsia was the only hypertensive complication to be increased in first pregnancies of WWE. This is of major clinical importance since mild preeclampsia, in contrast to severe forms of preeclampsia, is not associated with increased maternal or fetal morbidity or mortality in pregnancy.<sup>(15)</sup> WWE have previously been considered as high risk parturients by having a significant increase in several adverse pregnancy outcomes, including hypertensive complications.<sup>(2, 3, 10, 14)</sup> Our study shows that the increased risk does not include most WWE and especially not WWE on modern AEDs, nor does it include severe hypertensive complications. A healthcare system focusing on risk assessment, prevention of modifiable risk factors and modern treatment options should be the key to a further decrease in hypertensive complications in pregnant WWE.

## Acknowledgement:

This research was kindly supported by the Fund of Torbjørg Hauge's Legacy. We are grateful for data provision and linkage that was performed by Medical Birth Registry of Norway, Norwegian Prescription Database and Statistics Norway.

## Details of Ethics Approval:

This study was approved by the Regional Ethics Committee (REK 2013/186) and the Norwegian Data Protection Authority. The MBRN, NorPD and Statistics Norway approved the use of data. Use of Norwegian national register data does not require consent from the participants.

## Contribution to Authorship:

KCD conceived and designed the study, analysed the data and drafted the manuscript. IB provided input on design, interpretation and presentation of the study. NHM provided input on design and analyses, interpretation of analyses and critically revised the manuscript. NEG

Hypertensive pregnancy complications in women with epilepsy

conceived and designed the study, and critically revised the presentation and discussion of the results in the manuscript. The final manuscript was approved by all authors.

**Data sharing statement:**

Data from Medical Birth Registry of Norway and Norwegian Prescription Database are available at Norwegian Institute of Public Health.

For peer review only

## Hypertensive pregnancy complications in women with epilepsy

## REFERENCES

1. Artama M, Gissler M, Malm H, Ritvanen A, Drug, Pregnancy G. Effects of maternal epilepsy and antiepileptic drug use during pregnancy on perinatal health in offspring: nationwide, retrospective cohort study in Finland. *Drug safety*. 2013;36(5):359-69.
2. Borthen I, Eide MG, Veiby G, Daltveit AK, Gilhus NE. Complications during pregnancy in women with epilepsy: population-based cohort study. *BJOG : an international journal of obstetrics and gynaecology*. 2009;116(13):1736-42.
3. Borthen I, Eide MG, Daltveit AK, Gilhus NE. Obstetric outcome in women with epilepsy: a hospital-based, retrospective study. *BJOG : an international journal of obstetrics and gynaecology*. 2011;118(8):956-65.
4. Richmond JR, Krishnamoorthy P, Andermann E, Benjamin A. Epilepsy and pregnancy: an obstetric perspective. *American journal of obstetrics and gynecology*. 2004;190(2):371-9.
5. Weston J, Bromley R, Jackson CF, Adab N, Clayton-Smith J, Greenhalgh J, et al. Monotherapy treatment of epilepsy in pregnancy: congenital malformation outcomes in the child. *The Cochrane database of systematic reviews*. 2016;11:CD010224.
6. Bromley R, Weston J, Adab N, Greenhalgh J, Sanniti A, McKay AJ, et al. Treatment for epilepsy in pregnancy: neurodevelopmental outcomes in the child. *The Cochrane database of systematic reviews*. 2014(10):CD010236.
7. Gerard EE, Meador KJ. Managing Epilepsy in Women. *Continuum*. 2016;22(1 Epilepsy):204-26.
8. Tomson T, Xue H, Battino D. Major congenital malformations in children of women with epilepsy. *Seizure : the journal of the British Epilepsy Association*. 2015;28:46-50.
9. Say L, Chou D, Gemmill A, Tuncalp O, Moller AB, Daniels J, et al. Global causes of maternal death: a WHO systematic analysis. *The Lancet Global health*. 2014;2(6):e323-33.
10. Viale L, Allotey J, Cheong-See F, Arroyo-Manzano D, McCorry D, Bagary M, et al. Epilepsy in pregnancy and reproductive outcomes: a systematic review and meta-analysis. *Lancet*. 2015.
11. Viinikainen K, Heinonen S, Eriksson K, Kalviainen R. Community-based, prospective, controlled study of obstetric and neonatal outcome of 179 pregnancies in women with epilepsy. *Epilepsia*. 2006;47(1):186-92.
12. Pilo C, Wide K, Winbladh B. Pregnancy, delivery, and neonatal complications after treatment with antiepileptic drugs. *Acta obstetrica et gynecologica Scandinavica*. 2006;85(6):643-6.
13. Veiby G, Daltveit AK, Engelsen BA, Gilhus NE. Pregnancy, delivery, and outcome for the child in maternal epilepsy. *Epilepsia*. 2009;50(9):2130-9.
14. MacDonald SC, Bateman BT, McElrath TF, Hernandez-Diaz S. Mortality and Morbidity During Delivery Hospitalization Among Pregnant Women With Epilepsy in the United States. *JAMA neurology*. 2015;72(9):981-8.
15. Hypertension in pregnancy. Report of the American College of Obstetricians and Gynecologists' Task Force on Hypertension in Pregnancy. *Obstetrics and gynecology*. 2013;122(5):1122-31.
16. Belcastro V, D'Egidio C, Striano P, Verrotti A. Metabolic and endocrine effects of valproic acid chronic treatment. *Epilepsy research*. 2013;107(1-2):1-8.
17. Hu X, Wang J, Dong W, Fang Q, Hu L, Liu C. A meta-analysis of polycystic ovary syndrome in women taking valproate for epilepsy. *Epilepsy research*. 2011;97(1-2):73-82.
18. Qin JZ, Pang LH, Li MJ, Fan XJ, Huang RD, Chen HY. Obstetric complications in women with polycystic ovary syndrome: a systematic review and meta-analysis. *Reproductive biology and endocrinology : RB&E*. 2013;11:56.

## Hypertensive pregnancy complications in women with epilepsy

19. Isojarvi JI, Laatikainen TJ, Pakarinen AJ, Juntunen KT, Myllyla VV. Polycystic ovaries and hyperandrogenism in women taking valproate for epilepsy. *The New England journal of medicine*. 1993;329(19):1383-8.
20. Tomson T, Battino D, Bonizzoni E, Craig J, Lindhout D, Sabers A, et al. Dose-dependent risk of malformations with antiepileptic drugs: an analysis of data from the EURAP epilepsy and pregnancy registry. *Lancet neurology*. 2011;10(7):609-17.
21. Agency EM. CMDh agrees to strengthen warnings on the use of valproate medicines in women and girls: European Medicines Agency; 2014 [cited 2017]. Available from: [http://www.ema.europa.eu/ema/index.jsp?curl=pages/news\\_and\\_events/news/2014/11/news\\_detail\\_002220.jsp&mid=WC0b01ac058004d5c1](http://www.ema.europa.eu/ema/index.jsp?curl=pages/news_and_events/news/2014/11/news_detail_002220.jsp&mid=WC0b01ac058004d5c1).
22. Eurap Study G. Utilization of antiepileptic drugs during pregnancy: comparative patterns in 38 countries based on data from the EURAP registry. *Epilepsia*. 2009;50(10):2305-9.
23. Wilcox AJ. *Fertility and Pregnancy : An Epidemiologic Perspective*. Oxford: Oxford University Press, USA; 2010.
24. Ebbing C, Rasmussen S, Skjaerven R, Irgens LM. Risk factors for recurrence of hypertensive disorders of pregnancy, a population-based cohort study. *Acta obstetrica et gynecologica Scandinavica*. 2017;96(2):243-50.
25. Hernandez-Diaz S, Toh S, Cnattingius S. Risk of pre-eclampsia in first and subsequent pregnancies: prospective cohort study. *Bmj*. 2009;338:b2255.
26. Thomsen LC, Klungsoyr K, Roten LT, Tappert C, Araya E, Baerheim G, et al. Validity of the diagnosis of pre-eclampsia in the Medical Birth Registry of Norway. *Acta obstetrica et gynecologica Scandinavica*. 2013.
27. Klungsoyr K, Morken NH, Irgens L, Vollset SE, Skjaerven R. Secular trends in the epidemiology of pre-eclampsia throughout 40 years in Norway: prevalence, risk factors and perinatal survival. *Paediatric and perinatal epidemiology*. 2012;26(3):190-8.
28. Abalos E, Cuesta C, Grosso AL, Chou D, Say L. Global and regional estimates of preeclampsia and eclampsia: a systematic review. *European journal of obstetrics, gynecology, and reproductive biology*. 2013;170(1):1-7.
29. Kolstad E, Veiby G, Gilhus NE, Bjork M. Overweight in epilepsy as a risk factor for pregnancy and delivery complications. *Epilepsia*. 2016;57(11):1849-57.
30. WHO. Obesity Health Topic: World Health Organization; 2017 [updated 2017; cited 2017 June 2017]. Available from: <http://www.who.int/topics/obesity/en/>.

**Table 1. Maternal characteristics. First pregnancies as recorded in Medical Birth Registry of Norway (2004-2012).**

| N=223440                               | Women without Epilepsy | WWE          |           | WWE without AED |           | WWE with AED |           | WWE with polytherapy |           |
|----------------------------------------|------------------------|--------------|-----------|-----------------|-----------|--------------|-----------|----------------------|-----------|
|                                        | N=221662               | N=1778       | p - value | N=1096          | p - value | N=682        | p - value | N=128                | p - value |
|                                        |                        | N (%)        |           | N (%)           |           | N (%)        |           | N (%)                |           |
| <b>Maternal age</b>                    |                        |              |           |                 |           |              |           |                      |           |
| <19 years                              | 10519 (4.7)            | 116 (6.5)    | 0.001     | 82 (7.5)        | <0.001    | 34 (5.0)     | 0.729     | 8 (6.3)              | 0.401     |
| 20-24 years                            | 52 857 (23.8)          | 475 (26.7)   | 0.005     | 310 (28.3)      | 0.001     | 165 (24.2)   | 0.825     | 33 (25.8)            | 0.61      |
| 25-29 years                            | 82 004 (37.0)          | 564 (31.7)   | <0.001    | 332 (30.3)      | <0.001    | 232 (34.0)   | 0.113     | 46 (35.9)            | 0.852     |
| 30-34 years                            | 55 199 (24.9)          | 466 (26.2)   | 0.205     | 273 (24.9)      | 1         | 193 (28.3)   | 0.045     | 32 (25.0)            | 1         |
| 35-39 years                            | 17 992 (8.1)           | 124 (7.0)    | 0.083     | 78 (7.1)        | 0.245     | 46 (6.7)     | 0.208     | 8 (6.3)              | 0.52      |
| ≥40 years                              | 3091 (1.4)             | 33 (1.9)     | 0.099     | 21 (1.9)        | 0.153     | 12 (1.8)     | 0.41      | 1 (0.8)              | 1         |
| <b>Educational level</b>               |                        |              |           |                 |           |              |           |                      |           |
| 0-10 years                             | 31 241 (14.1)          | 367 (20.6)   | <0.001    | 219 (20.0)      | <0.001    | 148 (21.7)   | <0.001    | 40 (31.3)            | <0.001    |
| 11-13 years                            | 117 063 (52.8)         | 950 (53.4)   | 0.616     | 576 (52.6)      | 0.88      | 374 (54.8)   | 0.3       | 59 (46.1)            | 0.133     |
| ≥14 years                              | 23 732 (10.7)          | 118 (6.6)    | <0.001    | 73 (6.7)        | <0.001    | 45 (6.6)     | <0.001    | 3 (2.3)              | 0.001     |
| Other                                  | 7 659 (3.5)            | 39 (2.2)     | 0.004     | 29 (2.6)        | 0.162     | 10 (1.5)     | 0.004     | 4 (3.1)              | 1         |
| <b>Fetal plurality</b>                 |                        |              |           |                 |           |              |           |                      |           |
| Multifetal                             | 4 113 (1.9)            | 26 (1.5)     | 0.253     | 21 (1.9)        | 0.837     | 5 (0.7)      | 0.031     | 3 (2.3)              | 0.516     |
| <b>Gestational age</b>                 |                        |              |           |                 |           |              |           |                      |           |
| Mean (days)                            | 278.4                  | 277.3        | 0.002     | 277.1           | 0.006     | 277.5        | 0.139     | 276.1                | 0.079     |
| <b>Birth weight</b>                    |                        |              |           |                 |           |              |           |                      |           |
| Mean (grams)                           | 3414.4                 | 3381.2       | 0.019     | 3363.5          | 0.004     | 3410.9       | 0.876     | 3355.2               | 0.254     |
| <b>Body Mass Index</b>                 |                        |              |           |                 |           |              |           |                      |           |
| >30 kg/m <sup>2</sup> (form 2006)      | 60 232 (23.9)          | 508 (24.6)   | 0.001     | 291 (24.5)      | 0.056     | 217 (24.7)   | 0.013     | (40) 24.1            | 0.818     |
| <b>Smoking</b>                         |                        |              |           |                 |           |              |           |                      |           |
| Yes                                    | 27 898 (12.6)          | 322 (18.1)   | <0.001    | 215 (19.6)      | <0.001    | 107 (15.7)   | 0.016     | 28 (21.9)            | 0.002     |
| <b>Preexisting disease</b>             |                        |              |           |                 |           |              |           |                      |           |
| Hypertension, Kidney Disease, Diabetes | 4 117 (1.9)            | 59 (3.3)     | <0.001    | 31 (2.8)        | 0.02      | 28 (4.1)     | <0.001    | 8 (6.3)              | 0.003     |
| <b>Folic acid supplementation</b>      |                        |              |           |                 |           |              |           |                      |           |
| Before pregnancy                       | 55 168 (24.9)          | 563 (33.4)   | <0.001    | 303 (27.6)      | 0.038     | 290 (42.5)   | <0.001    | 51 (39.8)            | <0.001    |
| During pregnancy                       | 139 157 (62.8)         | 1 266 (71.2) | <0.001    | 723 (66.0)      | 0.031     | 543 (79.6)   | <0.001    | 98 (76.6)            | 0.002     |
| High dose                              | 2174 (1.0)             | 362 (20.4)   | <0.001    | 27 (2.5)        | <0.001    | 312 (45.7)   | <0.001    | 76 (59.4)            | <0.001    |

WWE = Women with Epilepsy  
AED = Antiepileptic Drug

Table 2. Hypertensive pregnancy complications in WWE, WWE with and without AED.

| N = 223440                | Women without Epilepsy |           | WWE                     |           | WWE without AED |                         |           | WWE with AED |                        |           | WWE with polytherapy |                        |           |
|---------------------------|------------------------|-----------|-------------------------|-----------|-----------------|-------------------------|-----------|--------------|------------------------|-----------|----------------------|------------------------|-----------|
|                           | N= 221662<br>N (%)     | N (%)     | N= 1778<br>aOR (95% CI) | p - value | N (%)           | N= 1096<br>aOR (95% CI) | p - value | N (%)        | N= 682<br>aOR (95% CI) | p - value | N (%)                | N= 128<br>aOR (95% CI) | p - value |
| Any Hypertensive Disorder | 16542 (7.5)            | 158 (8.9) | 1.23(1.03-1.48)*        | 0.022     | 93 (8.5)        | 1.21(0.96-1.53)         | 0.102     | 65 (9.5)     | 1.27(0.96-1.68)        | 0.1       | 10 (7.8)             | 1.01(0.53-1.93)        | 0.98      |
| Gestational Hypertension  | 5381 (2.4)             | 43 (2.4)  | 1.04(0.75-1.45)         | 0.817     | 22 (2.0)        | 0.90(0.57-1.43)         | 0.665     | 21 (3.1)     | 1.25(0.77-2.03)        | 0.367     | 5 (3.9)              | 1.78(0.73-4.4)         | 0.21      |
| Mild Preeclampsia         | 6445 (2.9)             | 68 (3.8)  | 1.42 (1.10-1.84)        | 0.007     | 42 (3.8)        | 1.44(1.04-2.00)***      | 0.028     | 26 (3.8)     | 1.39(0.92-2.10)        | 0.117     | 4 (3.1)              | 0.96(0.36-2.6)         | 0.943     |
| Severe Preeclampsia       | 4330 (1.9)             | 46 (2.6)  | 1.30(0.97-1.75)         | 0.081     | 29 (2.6)        | 1.32(0.91-1.92)         | 0.145     | 17 (2.5)     | 1.28(0.79-2.07)        | 0.327     | 1 (0.8)              | 0.36(0.05-2.55)        | 0.303     |
| Early Onset Preeclampsia  | 1299 (0.6)             | 19 (1.1)  | 1.69(1.01-2.82)**       | 0.047     | 11 (1.0)        | 1.67(0.86-3.23)         | 0.131     | 8 (1.2)      | 1.72(0.77-3.87)        | 0.189     | -                    | -                      | -         |
| HELLP                     | 518 (0.2)              | 6 (0.3)   | 1.18(0.44-3.17)         | 0.743     | 2 (0.2)         | 0.97(0.24-3.91)         | 0.969     | 4 (0.6)      | 1.50(0.37-6.03)        | 0.571     | -                    | -                      | -         |
| Eclampsia                 | 191 (0.1)              | 3 (0.2)   | 2.18(0.69-6.84)         | 0.183     | 2 (0.2)         | 2.35(0.58-9.49)         | 0.232     | 1 (0.1)      | 1.88(0.26-13.49)       | 0.529     | -                    | -                      | -         |

WWE = Women with Epilepsy

AED = Antiepileptic Drug

aOR = Adjusted Odds Ratio (Adjusted for maternal age, Educational level, Multifetal pregnancy, Other relevant chronic disease, Folic acid supplementation)

95% CI = 95% Confidence Interval

\*Not significant in sensitivity analyses when including BMI >30kg/m<sup>2</sup>

\*\*Not significant in sensitivity analyses when including smoking or BMI >30kg/m<sup>2</sup>

\*\*\* Not significant in sensitivity analyses when including other relevant diseases

1  
2 **Table 3. Hypertensive pregnancy complications in WWE with specified AEDs.**

| 3                                   | 4 <b>Women without</b> |                 | 5 <b>WWE with LTG</b>  |                   | 6 <b>WWE with CBZ</b> |                        |                   | 7 <b>WWE with LEV</b> |                        |                   | 8 <b>WWE with VPA</b> |                        |                   |
|-------------------------------------|------------------------|-----------------|------------------------|-------------------|-----------------------|------------------------|-------------------|-----------------------|------------------------|-------------------|-----------------------|------------------------|-------------------|
| 9                                   | 10 <b>Epilepsy</b>     |                 |                        |                   |                       |                        |                   |                       |                        |                   |                       |                        |                   |
| 11                                  | 12 <b>N=221662</b>     |                 | 13 <b>N=280</b>        |                   | 14 <b>N=94</b>        |                        |                   | 15 <b>N=71</b>        |                        |                   | 16 <b>N=51</b>        |                        |                   |
| 17                                  | 18 <b>N (%)</b>        | 19 <b>N (%)</b> | 20 <b>aOR (95% CI)</b> | 21 <b>p-value</b> | 22 <b>N (%)</b>       | 23 <b>aOR (95% CI)</b> | 24 <b>p-value</b> | 25 <b>N (%)</b>       | 26 <b>aOR (95% CI)</b> | 27 <b>p-value</b> | 28 <b>N (%)</b>       | 29 <b>aOR (95% CI)</b> | 30 <b>p-value</b> |
| 31 <b>Any Hypertensive Disorder</b> | 16542 (7.5)            | 25 (8.9)        | 1.20(0.76-1.88)        | 0.434             | 7 (7.4)               | 0.97(0.42-2.25)        | 0.946             | 7 (9.9)               | 1.32(0.57-3.05)        | 0.523             | 9 (17.6)              | 2.93(1.35-6.38)*       | 0.007             |
| 32 <b>Gestational Hypertension</b>  | 5381 (2.4)             | 7 (2.5)         | 1.07(0.48-2.42)        | 0.865             | 1 (1.1)               | 0.48(0.07-3.44)        | 0.462             | 2 (2.8)               | 1.32(0.32-5.41)        | 0.698             | 3 (5.9)               | 3.31(1.02-10.77)**     | 0.047             |
| 33 <b>Mild Preeclampsia</b>         | 6445 (2.9)             | 11 (3.8)        | 1.41(0.75-2.66)        | 0.291             | 2 (2.1)               | 0.85(0.21-3.49)        | 0.824             | 3 (4.2)               | 1.66(0.52-5.30)        | 0.39              | 5 (9.8)               | 3.32(1.18-9.35)*       | 0.023             |
| 34 <b>Severe Preeclampsia</b>       | 4330 (1.9)             | 6 (2.1)         | 1.21(0.50-2.53)        | 0.783             | 4 (4.3)               | 2.23(0.81-6.12)        | 0.120             | 3 (4.2)               | 2.36(0.74-7.50)        | 0.146             | 1 (2.0)               | 1.01(0.14-7.37)        | 0.991             |
| 35 <b>Early Onset Preeclampsia</b>  | 1299 (0.6)             | 3 (1.1)         | 1.45(0.36-5.87)        | 0.602             | 2 (2.1)               | 4.04(0.98-16.76)       | 0.054             | 2 (2.8)               | 6.00(1.47-24.59)*      | 0.013             | -                     | -                      | -                 |
| 36 <b>HELLP</b>                     | 518 (0.2)              | -               | -                      | -                 | 2 (2.1)               | 5.02(0.69-36-36)       | 0.11              | -                     | -                      | -                 | 1 (2.0)               | 8.54(1.18-61.92)       | 0.113             |
| 37 <b>Eclampsia</b>                 | 191 (0.1)              | -               | -                      | -                 | 1 (1.1)               | 12.47(1.73-89.91)      | 0.078             | -                     | -                      | -                 | -                     | -                      | -                 |

19 WWE = Women with Epilepsy  
 20 AED = Antiepileptic Drug  
 21 LTG = Lamotrigine  
 22 CBZ = Carbamazepine  
 23 VPA = Valproic acid  
 24 LEV = Levetiracetam  
 25 OR = Odds Ratio  
 26 aOR = Adjusted Odds Ratio (Adjusted for maternal age, Educational level, Multifetal pregnancy, Pre-existing diseases, Folic acid supplementation)  
 27 95% CI = 95% Confidence Interval  
 28 \*Not significant in sensitivity analyses when including BMI >30kg/m<sup>2</sup>  
 29 \*\*Not significant in sensitivity analyses when including smoking or BMI >30kg/m<sup>2</sup>



## STROBE Statement—checklist of items that should be included in reports of observational studies

|                              | Item No. | Recommendation                                                                                                                                                                                                                                                                                                      | Page No. | Relevant text from manuscript |
|------------------------------|----------|---------------------------------------------------------------------------------------------------------------------------------------------------------------------------------------------------------------------------------------------------------------------------------------------------------------------|----------|-------------------------------|
| <b>Title and abstract</b>    | 1        | (a) Indicate the study's design with a commonly used term in the title or the abstract                                                                                                                                                                                                                              | 1        |                               |
|                              |          | (b) Provide in the abstract an informative and balanced summary of what was done and what was found                                                                                                                                                                                                                 | 2        |                               |
| <b>Introduction</b>          |          |                                                                                                                                                                                                                                                                                                                     |          |                               |
| Background/rationale         | 2        | Explain the scientific background and rationale for the investigation being reported                                                                                                                                                                                                                                | 4        |                               |
| Objectives                   | 3        | State specific objectives, including any prespecified hypotheses                                                                                                                                                                                                                                                    | 4        |                               |
| <b>Methods</b>               |          |                                                                                                                                                                                                                                                                                                                     |          |                               |
| Study design                 | 4        | Present key elements of study design early in the paper                                                                                                                                                                                                                                                             | 5        |                               |
| Setting                      | 5        | Describe the setting, locations, and relevant dates, including periods of recruitment, exposure, follow-up, and data collection                                                                                                                                                                                     | 5        |                               |
| Participants                 | 6        | (a) <i>Cohort study</i> —Give the eligibility criteria, and the sources and methods of selection of participants. Describe methods of follow-up                                                                                                                                                                     | 5        |                               |
|                              |          | <i>Case-control study</i> —Give the eligibility criteria, and the sources and methods of case ascertainment and control selection. Give the rationale for the choice of cases and controls<br><i>Cross-sectional study</i> —Give the eligibility criteria, and the sources and methods of selection of participants |          |                               |
|                              |          | (b) <i>Cohort study</i> —For matched studies, give matching criteria and number of exposed and unexposed                                                                                                                                                                                                            |          |                               |
|                              |          | <i>Case-control study</i> —For matched studies, give matching criteria and the number of controls per case                                                                                                                                                                                                          |          |                               |
| Variables                    | 7        | Clearly define all outcomes, exposures, predictors, potential confounders, and effect modifiers. Give diagnostic criteria, if applicable                                                                                                                                                                            | 5-6      |                               |
| Data sources/<br>measurement | 8*       | For each variable of interest, give sources of data and details of methods of assessment (measurement). Describe comparability of assessment methods if there is more than one group                                                                                                                                | 5-6      |                               |
| Bias                         | 9        | Describe any efforts to address potential sources of bias                                                                                                                                                                                                                                                           | 5-7      |                               |
| Study size                   | 10       | Explain how the study size was arrived at                                                                                                                                                                                                                                                                           | 4-5      |                               |

Continued on next page

|                        |     |                                                                                                                                                                                                                        |                   |
|------------------------|-----|------------------------------------------------------------------------------------------------------------------------------------------------------------------------------------------------------------------------|-------------------|
| Quantitative variables | 11  | Explain how quantitative variables were handled in the analyses. If applicable, describe which groupings were chosen and why                                                                                           | 7                 |
| Statistical methods    | 12  | (a) Describe all statistical methods, including those used to control for confounding                                                                                                                                  | 7                 |
|                        |     | (b) Describe any methods used to examine subgroups and interactions                                                                                                                                                    | 7-8               |
|                        |     | (c) Explain how missing data were addressed                                                                                                                                                                            | 8                 |
|                        |     | (d) <i>Cohort study</i> —If applicable, explain how loss to follow-up was addressed                                                                                                                                    | NA                |
|                        |     | (e) <i>Case-control study</i> —If applicable, explain how matching of cases and controls was addressed<br><i>Cross-sectional study</i> —If applicable, describe analytical methods taking account of sampling strategy | 8                 |
|                        |     | (e) Describe any sensitivity analyses                                                                                                                                                                                  | 8                 |
| <b>Results</b>         |     |                                                                                                                                                                                                                        |                   |
| Participants           | 13* | (a) Report numbers of individuals at each stage of study—eg numbers potentially eligible, examined for eligibility, confirmed eligible, included in the study, completing follow-up, and analysed                      | 9                 |
|                        |     | (b) Give reasons for non-participation at each stage                                                                                                                                                                   | NA                |
|                        |     | (c) Consider use of a flow diagram                                                                                                                                                                                     | NA                |
| Descriptive data       | 14* | (a) Give characteristics of study participants (eg demographic, clinical, social) and information on exposures and potential confounders                                                                               | 9 (Table 1)       |
|                        |     | (b) Indicate number of participants with missing data for each variable of interest                                                                                                                                    | 9 (Table 1)       |
|                        |     | (c) <i>Cohort study</i> —Summarise follow-up time (eg, average and total amount)                                                                                                                                       | NA                |
| Outcome data           | 15* | <i>Cohort study</i> —Report numbers of outcome events or summary measures over time                                                                                                                                    | 9 (Table 2 and 3) |
|                        |     | <i>Case-control study</i> —Report numbers in each exposure category, or summary measures of exposure                                                                                                                   |                   |
|                        |     | <i>Cross-sectional study</i> —Report numbers of outcome events or summary measures                                                                                                                                     |                   |
| Main results           | 16  | (a) Give unadjusted estimates and, if applicable, confounder-adjusted estimates and their precision (eg, 95% confidence interval). Make clear which confounders were adjusted for and why they were included           | (Table 2 and 3)   |
|                        |     | (b) Report category boundaries when continuous variables were categorized                                                                                                                                              | NA                |
|                        |     | (c) If relevant, consider translating estimates of relative risk into absolute risk for a meaningful time period                                                                                                       | NA                |

Continued on next page

|                          |    |                                                                                                                                                                            |    |
|--------------------------|----|----------------------------------------------------------------------------------------------------------------------------------------------------------------------------|----|
| Other analyses           | 17 | Report other analyses done—eg analyses of subgroups and interactions, and sensitivity analyses                                                                             | 10 |
| <b>Discussion</b>        |    |                                                                                                                                                                            |    |
| Key results              | 18 | Summarise key results with reference to study objectives                                                                                                                   | 12 |
| Limitations              | 19 | Discuss limitations of the study, taking into account sources of potential bias or imprecision. Discuss both direction and magnitude of any potential bias                 | 14 |
| Interpretation           | 20 | Give a cautious overall interpretation of results considering objectives, limitations, multiplicity of analyses, results from similar studies, and other relevant evidence | 16 |
| Generalisability         | 21 | Discuss the generalisability (external validity) of the study results                                                                                                      | 16 |
| <b>Other information</b> |    |                                                                                                                                                                            |    |
| Funding                  | 22 | Give the source of funding and the role of the funders for the present study and, if applicable, for the original study on which the present article is based              | 16 |

\*Give information separately for cases and controls in case-control studies and, if applicable, for exposed and unexposed groups in cohort and cross-sectional studies.

**Note:** An Explanation and Elaboration article discusses each checklist item and gives methodological background and published examples of transparent reporting. The STROBE checklist is best used in conjunction with this article (freely available on the Web sites of PLoS Medicine at <http://www.plosmedicine.org/>, Annals of Internal Medicine at <http://www.annals.org/>, and Epidemiology at <http://www.epidem.com/>). Information on the STROBE Initiative is available at [www.strobe-statement.org](http://www.strobe-statement.org).

# BMJ Open

## Hypertensive pregnancy complications in women with epilepsy and antiepileptic drugs: a population-based cohort study of first pregnancies in Norway

|                                 |                                                                                                                                                                                                                                                                                                                                                                                                                                                                                                                                                                                                   |
|---------------------------------|---------------------------------------------------------------------------------------------------------------------------------------------------------------------------------------------------------------------------------------------------------------------------------------------------------------------------------------------------------------------------------------------------------------------------------------------------------------------------------------------------------------------------------------------------------------------------------------------------|
| Journal:                        | <i>BMJ Open</i>                                                                                                                                                                                                                                                                                                                                                                                                                                                                                                                                                                                   |
| Manuscript ID                   | bmjopen-2017-020998.R1                                                                                                                                                                                                                                                                                                                                                                                                                                                                                                                                                                            |
| Article Type:                   | Research                                                                                                                                                                                                                                                                                                                                                                                                                                                                                                                                                                                          |
| Date Submitted by the Author:   | 22-Feb-2018                                                                                                                                                                                                                                                                                                                                                                                                                                                                                                                                                                                       |
| Complete List of Authors:       | Danielsson, Kim; Haukeland University Hospital, Department of Obstetrics and Gynecology; University of Bergen, Faculty of Medicine, Department of Clinical Medicine<br>Borthen, Ingrid; University of Bergen, Faculty of Medicine, Department of Clinical Medicine<br>Morken, Nils-Halvdan; University of Bergen, Faculty of Medicine, Department of Clinical Science; Haukeland University Hospital, Department of Obstetrics and Gynecology<br>Gilhus, Nils; University of Bergen, Faculty of Medicine, Department of Clinical Medicine; Haukeland University Hospital, Department of Neurology |
| <b>Primary Subject Heading</b>: | Obstetrics and gynaecology                                                                                                                                                                                                                                                                                                                                                                                                                                                                                                                                                                        |
| Secondary Subject Heading:      | Obstetrics and gynaecology, Epidemiology, Neurology                                                                                                                                                                                                                                                                                                                                                                                                                                                                                                                                               |
| Keywords:                       | Epilepsy < NEUROLOGY, Pregnancy, Antiepileptic drugs, Hypertensive disorder, Preeclampsia, Medical Birth Registry of Norway                                                                                                                                                                                                                                                                                                                                                                                                                                                                       |
|                                 |                                                                                                                                                                                                                                                                                                                                                                                                                                                                                                                                                                                                   |

SCHOLARONE™  
Manuscripts

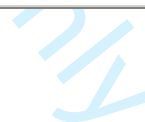

Hypertensive pregnancy complications in women with epilepsy

# Hypertensive pregnancy complications in women with epilepsy and antiepileptic drugs: a population-based cohort study of first pregnancies in Norway

---

**Kim Christian Danielsson, MD** <sup>a,b</sup>

**Ingrid Borthen, MD, PhD** <sup>b</sup>

**Nils-Halvdan Morken, MD, PhD** <sup>a,c</sup>

**Nils Erik Gilhus, MD, PhD** <sup>b,d</sup>

<sup>a</sup> Department of Obstetrics and Gynecology, Haukeland University Hospital, Bergen, Norway.

<sup>b</sup> Department of Clinical Medicine, University of Bergen, Norway.

<sup>c</sup> Department of Clinical Science, University of Bergen

<sup>d</sup> Department of Neurology, Haukeland University Hospital, Bergen, Norway.

Corresponding author:

Kim Christian Danielsson:

Department of Obstetrics and Gynecology,

Haukeland University Hospital,

Postboks 1400

5021 Bergen, Norway.

E-mail: [kim.christian.danielsson@helse-bergen.no](mailto:kim.christian.danielsson@helse-bergen.no)

Mobile phone: +47 95761169

Telefax: +47 55974968

Short title:

Hypertensive pregnancy complications in women with epilepsy

Word count: 3287

Tables: 3

## Hypertensive pregnancy complications in women with epilepsy

### **Abstract**

#### **Objectives:**

To estimate the risk of hypertensive pregnancy complications in women with epilepsy, with and without antiepileptic drugs, and assess the risk associated with the four most common antiepileptic drugs.

#### **Design:**

A population-based cohort study using linked data from the Medical Birth Registry of Norway and the Norwegian Prescription Database. Women with epilepsy with and without antiepileptic drugs were compared to women without epilepsy.

#### **Setting:**

Norway, 2004-2012.

#### **Participants:**

All first pregnancies of women with epilepsy and women without epilepsy were included.

#### **Primary and secondary outcome measures:**

Main outcome measures were hypertensive pregnancy complications: a compound variable of any hypertensive disorder, gestational hypertension, mild preeclampsia, severe preeclampsia, early onset preeclampsia, eclampsia, and HELLP syndrome.

#### **Results:**

In total 1778 pregnancies in women with epilepsy and 221 662 in women without epilepsy were analysed. 682 of the women with epilepsy used antiepileptic drugs, the most common in monotherapy being: lamotrigine (N=280), carbamazepine (N=94), levetiracetam (N=71), and valproate (N=51). There was an increased risk of any hypertensive disorder in women with epilepsy (adjusted odds ratio [aOR]: 1.2, 95% CI 1.0-1.5) and in the subcategory using valproat (aOR: 2.9: 95% CI: 1.3-6.4). The most frequent hypertensive complication was mild

Hypertensive pregnancy complications in women with epilepsy

preeclampsia and the risk was increased in women with epilepsy (aOR: 1.4, 95% CI: 1.1-1.8) and women with epilepsy with valproate (aOR: 3.3; 95% CI: 1.2-9.4).

### **Conclusions:**

Women with epilepsy have an increased risk of mild preeclampsia, but not for the severe types of hypertensive pregnancy complications. Lamotrigine and levetiracetam do not predispose for mild preeclampsia, whereas valproate was associated with an increased risk of mild preeclampsia.

### **Strengths and limitations of this study:**

- + Large population based national cohort with data from compulsory and reliable national health registries
- + Only first pregnancies were included to avoid bias from recurrent events
- + We have studied type and severity of hypertensive complications in pregnancy and associations with use of specific antiepileptic drugs.
- We had no data on type of epilepsy or seizure activity

### **Funding**

This research was kindly supported by the Fund of Torbjørn Hauge's Legacy.

### **Competing interests:**

None of the authors have any conflict of interest to disclose.

## Hypertensive pregnancy complications in women with epilepsy

### Introduction

Epilepsy is the most common neurologic disorder requiring continuous drug treatment during pregnancy, and 30 - 70% of pregnant women with epilepsy (WWE) use antiepileptic drugs (AEDs).<sup>(1-4)</sup> Consequences of maternal AED use during pregnancy for fetal malformations and early childhood development have been focused.<sup>(5-8)</sup> In contrast, potential effects of epilepsy and specific AEDs on the pregnancy have been less studied. Optimal therapy in epilepsy is a balance between seizure suppression and side-effects. For women in fertile age, potential AED effects for the fetus as well as on the pregnancy should be of the highest relevance.

Hypertensive pregnancy complications include multiple diagnoses with different risks and implications for fetal and maternal outcomes. Hypertensive pregnancy complications represent a major contributor to global maternal mortality.<sup>(9)</sup> Most previous studies, including a recent meta-analysis, have found an increased risk of total hypertensive complications in WWE but these studies have not differentiated between the specific hypertensive disorders and therefore the burden of disease in WWE is uncertain.<sup>(2, 3, 10-14)</sup> Studies on the effect of specific AEDs on pregnant women with epilepsy have been limited by small sample size, selection bias, and lack of detailed information on hypertensive disorders.<sup>(2, 3, 10-13, 15)</sup>

Recently, a small cohort study found an increased risk of preeclampsia in WWE with the newer AED lamotrigine.<sup>(3)</sup> Some studies have also suggested an increased preeclampsia risk with the older AEDs, carbamazepine and valproate.<sup>(12, 13)</sup> Many AED work by blocking ion channels, enhancing gamma-aminobutyric acid receptors or blocking glutamate receptors, and they stabilize and inactivate neurons. Valproate can induce endocrine changes and metabolic syndrome in WWE and possibly also hypertensive complications in pregnancy.<sup>(16)</sup> No other AED mode of action is known to pose any increased risk for hypertension or preeclampsia.



Hypertensive pregnancy complications in women with epilepsy

Preferred drugs and drugs to be avoided in pregnancy have not been identified, despite an increased use in young women of the newer AEDs lamotrigine and levetiracetam.<sup>(17, 18)</sup>

The aim of the present study was to estimate the risk of specified hypertensive pregnancy complications in WWE with and without use of AEDs, and to specifically define the risk for the four most common AEDs. This is necessary to guide optimal AED treatment in young women before and during pregnancy.

For peer review only

Hypertensive pregnancy complications in women with epilepsy

### Materials and Methods

We used data from the compulsory, population-based Medical Birth Registry of Norway (MBRN) collected during 2004-2012. The notification form of the MBRN was unchanged in that period. MBRN includes data on maternal and paternal social factors, maternal health prior to and during pregnancy including chronic diseases such as epilepsy, complications and interventions during pregnancy and birth, perinatal outcome and complications in the children. Data are prospectively registered throughout pregnancy, delivery and postpartum period. All data are forwarded to the MBRN by the attending midwife or obstetrician. All pregnancies from 12 weeks gestation are recorded. The registry is routinely linked to the National Population Database to ensure notification of all births and deaths in the country. All Norwegian citizens are given a unique Social Security Number that enables linkage of data from various national data sources. Only first time pregnancies were included in this study, all singleton and multiple pregnancies at >22 weeks of gestation.

The Norwegian Prescription Database (NorPD), commenced in 2004, provides detailed data on all medications dispensed from pharmacies by prescription. Mandatory registration in NorPD of every dispensed medical prescription is made by the pharmacist. Statistics Norway provided data on maternal level of education.

Main outcome variables were a compound variable of any hypertensive disorder in pregnancy, gestational hypertension, mild preeclampsia, severe preeclampsia, early onset preeclampsia, eclampsia, and HELLP syndrome (Haemolysis, Elevated Liver enzymes, Low Platelets). Exposure variables were a diagnosis of epilepsy and use of AEDs. All hypertensive disorders, except the compound variable, are reported in MBRN in specified checkboxes. Checkboxes are not mutually exclusive. Therefore, we used the most severe diagnosis to exclude double registration. Gestational hypertension was defined as persisting elevated blood pressure  $\geq 140$  mmHg systolic and/or  $\geq 90$  mmHg diastolic occurring after 20 weeks of

## Hypertensive pregnancy complications in women with epilepsy

1  
2 gestation and without pre-existing hypertension.<sup>(19)</sup> Mild preeclampsia was defined as  
3  
4 persisting elevated blood pressure  $\geq 140$  mmHg systolic and/or  $\geq 90$  mmHg diastolic combined  
5  
6 with proteinuria  $\geq 0,3$ g per 24 hours (equivalent to  $\geq +1$  on urine test strips for protein  
7  
8 excretion) occurring after 20 weeks of gestation. Severe preeclampsia was defined as blood  
9  
10 pressure  $\geq 160/110$  mmHg, clinical symptoms of preeclampsia, protein excretion  $\geq 3$  g per 24  
11  
12 hours or oliguria, and also included all cases of early onset preeclampsia ( $< 34$  weeks),  
13  
14 eclampsia or HELLP syndrome. Eclampsia was defined as generalized seizures occurring  
15  
16 simultaneously with preeclampsia or hypertension and without other cause. Early onset  
17  
18 preeclampsia was defined as preeclampsia with onset before 34 weeks of gestation. The  
19  
20 compound variable of any hypertensive disorder was defined as the presence of any of these  
21  
22 hypertensive disorders. Superimposed preeclampsia in women with pre-gestational  
23  
24 hypertension was not specified but was included in the respective subcategories of  
25  
26 hypertensive complications by severity.  
27  
28  
29

30 Maternal epilepsy was defined by either ticking the specific checkbox in MBRN or adding  
31  
32 this diagnosis in a blank space available for written text. Neither of these provided  
33  
34 information about the type of epilepsy or seizure activity. The diagnosis was based on  
35  
36 previous medical history and medical charts. The epilepsy diagnosis in MBRN has previously  
37  
38 been found to be valid in 92.3 % of cases, having been confirmed in hospital medical  
39  
40 records.<sup>(3)</sup>  
41  
42

43 NorPD provided exact data on dispensed AEDs and high-dose folic acid supplementation  
44  
45 (4mg/day) including type of medication (according to ATC codes), dose, and time of  
46  
47 administration. We defined AED use in pregnancy as dispensed drugs from the pharmacy in  
48  
49 the time period coinciding with gestation, dated by ultrasound assessment. In cases with  
50  
51 missing ultrasound dates, last menstrual period was used. We assessed drug dispensation also  
52  
53 one and three months pre-conception. An a priori decision was made to primarily analyse the  
54  
55  
56  
57  
58  
59  
60

## Hypertensive pregnancy complications in women with epilepsy

four most commonly used AEDs in monotherapy in order to obtain large enough groups and exclude interference of polytherapy. Information about AED use in pregnancy is also recorded in MBRN on the notification form in an available blank space for written text. This information was used to validate the AED use obtained from MBRN compared to NorPD. Positive predictive values for AED data in MBRN were calculated by matching with confirmed AED dispensation in NorPD during pregnancy. The positive predictive values were 0.94 for lamotrigine, 0.82 for carbamazepine, 0.95 for levetiracetam and 0.84 for valproate, providing acceptable registration.

Socio-demographic and background data included maternal age ( $\leq 19$  years, 20-24 years, 25-29 years, 30-34 years, 35-39 years and  $\geq 40$  years), maternal educational level ( $\leq 10$  years, 11-13 years,  $\geq 14$  years), other chronic disease (kidney disease, hypertension, diabetes mellitus), multifetal pregnancies, high pre-gestational body mass index (BMI) ( $\text{BMI} \geq 30 \text{kg/m}^2$ ), smoking during pregnancy, and use of folic acid supplementation in standard dose (0.4mg/day). The BMI variable was only available from 2006 onwards. Data on ethnicity and marital status were not available for this study.

We further categorized WWE by AED-treatment; all AEDs, no AEDs, AED polytherapy, and the four most common AEDs. Outcome variables for specific AEDs were analysed only in WWE with monotherapy. WWE using other than the four most common AEDs were identified and excluded from the analyses where appropriate. WWE and all treatment subcategories were compared with women without epilepsy. WWE with AED treatment were also compared to WWE without AEDs.

For binary outcomes, proportions and crude odds ratios (OR) were calculated using contingency tables. P-values were calculated using Fisher's exact test. Continuous variables (background variables) were analysed with independent sample t-tests. Statistical significance was defined as non-overlapping 95% confidence intervals (95% CI) and two sided p-values <

Hypertensive pregnancy complications in women with epilepsy

0.05. All statistical analyses were performed with IBM SPSS (Statistical Package for Social Sciences) version 22.0 or later.

We used logistic regression to adjust for possible confounding by maternal age, educational level, multifetal pregnancy, use of folic acid supplements, and other relevant chronic diseases (pre-existing hypertension, pre-existing kidney disease, and pre-existing diabetes mellitus).

The covariates BMI (only registered since 2006) and smoking were restrained by missing cases and therefore studied with stratification-based sensitivity analyses applied on all results and not included in the final logistic regression models. The impact of other relevant chronic diseases was similarly analysed further with stratification-based sensitivity analyses.

This study was approved by the Regional Ethics Committee (REK 2013/186) and the Norwegian Data Protection Authority. The MBRN, NorPD and Statistics Norway approved the use of data. Use of Norwegian national register data does not require consent from the participants.

### **Patient involvement**

The Norwegian Epilepsy Association provided input to the research questions in this study.

## Hypertensive pregnancy complications in women with epilepsy

**Results**

223 440 first time pregnancies were eligible after exclusion of multipara pregnancies (309 364), missing personal identification number (1 514, 0.7% [foreigners or immigrants without residence permit]), and pregnancies <23 gestational weeks (340, 0.2%). There were 1778 WWE (0.79 %), of whom 682 (38.4 % of WWE) used AEDs either in monotherapy (554 women) or in polytherapy (128 women). The most common AEDs used as monotherapy were lamotrigine (280 women, 50.5 % of all monotherapies), carbamazepine (94 women, 17.0 %), levetiracetam (71 women, 12.8 %), and valproate (51 women, 9.2 %). Other AEDs in monotherapy were used by 58 WWE. Maternal characteristics are shown in Table 1.

**Table 1. Maternal characteristics. First pregnancies as recorded in Medical Birth Registry of Norway (2004-2012).**

| N=223440                 | Women without Epilepsy | WWE        |                 | WWE without AED |                 | WWE with AED |
|--------------------------|------------------------|------------|-----------------|-----------------|-----------------|--------------|
|                          |                        | N=221662   | N=1778<br>N (%) | p - value       | N=1096<br>N (%) |              |
| <b>Maternal age</b>      |                        |            |                 |                 |                 |              |
| <19 years                | 10519 (4.7)            | 116 (6.5)  | 0.001           | 82 (7.5)        | <0.001          | 34 (1.9)     |
| 20-24 years              | 52 857 (23.8)          | 475 (26.7) | 0.005           | 310 (28.3)      | 0.001           | 165 (9.2)    |
| 25-29 years              | 82 004 (37.0)          | 564 (31.7) | <0.001          | 332 (30.3)      | <0.001          | 232 (13.0)   |
| 30-34 years              | 55 199 (24.9)          | 466 (26.2) | 0.205           | 273 (24.9)      | 1               | 193 (10.8)   |
| 35-39 years              | 17 992 (8.1)           | 124 (7.0)  | 0.083           | 78 (7.1)        | 0.245           | 46 (2.6)     |
| ≥40 years                | 3091 (1.4)             | 33 (1.9)   | 0.099           | 21 (1.9)        | 0.153           | 12 (0.7)     |
| <b>Educational level</b> |                        |            |                 |                 |                 |              |
| 0-10 years               | 31 241 (14.1)          | 367 (20.6) | <0.001          | 219 (20.0)      | <0.001          | 148 (8.2)    |
| 11-13 years              | 117 063 (52.8)         | 950 (53.4) | 0.616           | 576 (52.6)      | 0.88            | 374 (21.1)   |
| ≥14 years                | 23 732 (10.7)          | 118 (6.6)  | <0.001          | 73 (6.7)        | <0.001          | 45 (2.5)     |
| Other                    | 7 659 (3.5)            | 39 (2.2)   | 0.004           | 29 (2.6)        | 0.162           | 10 (0.6)     |
| <b>Fetal plurality</b>   |                        |            |                 |                 |                 |              |
| Multifetal               | 4 113 (1.9)            | 26 (1.5)   | 0.253           | 21 (1.9)        | 0.837           | 5 (0.3)      |
| <b>Gestational age</b>   |                        |            |                 |                 |                 |              |
| Mean (days)              | 278.4                  | 277.3      | 0.002           | 277.1           | 0.006           | 277.1        |

## Hypertensive pregnancy complications in women with epilepsy

| <b>Birth weight</b>                    |                |              |        |            |        |       |
|----------------------------------------|----------------|--------------|--------|------------|--------|-------|
| Mean (grams)                           | 3414.4         | 3381.2       | 0.019  | 3363.5     | 0.004  | 341   |
| <b>Body Mass Index</b>                 |                |              |        |            |        |       |
| >30 kg/m <sup>2</sup> (form 2006)      | 60 232 (23.9)  | 508 (24.6)   | 0.001  | 291 (24.5) | 0.056  | 217 ( |
| <b>Smoking</b>                         |                |              |        |            |        |       |
| Yes                                    | 27 898 (12.6)  | 322 (18.1)   | <0.001 | 215 (19.6) | <0.001 | 107 ( |
| <b>Preexisting disease</b>             |                |              |        |            |        |       |
| Hypertension, Kidney Disease, Diabetes | 4 117 (1.9)    | 59 (3.3)     | <0.001 | 31 (2.8)   | 0.02   | 28 (  |
| <b>Folic acid supplementation</b>      |                |              |        |            |        |       |
| Before pregnancy                       | 55 168 (24.9)  | 563 (33.4)   | <0.001 | 303 (27.6) | 0.038  | 290 ( |
| During pregnancy                       | 139 157 (62.8) | 1 266 (71.2) | <0.001 | 723 (66.0) | 0.031  | 543 ( |
| High dose                              | 2174 (1.0)     | 362 (20.4)   | <0.001 | 27 (2.5)   | <0.001 | 312 ( |

WWE = Women with Epilepsy  
AED = Antiepileptic Drug

The adjusted odds ratio (aOR) of the compound variable any hypertensive disorder was increased in WWE (aOR 1.2, 95% CI: 1.0-1.5) compared to women without epilepsy. However, the occurrence of any hypertensive disorder in neither the group WWE with AED nor the group WWE without AED differed significantly from women without epilepsy when examined separately.

The majority of hypertensive complications were mild preeclampsia (Table 2).

**Table 2. Hypertensive pregnancy complications in WWE, WWE with and without AED.**

| N = 223440                       | Women without Epilepsy |           | WWE              |           | WWE without AED |                    |
|----------------------------------|------------------------|-----------|------------------|-----------|-----------------|--------------------|
|                                  | N= 221662              | N (%)     | N= 1778          | p - value | N (%)           | N= 1096            |
|                                  | N (%)                  | N (%)     | aOR (95% CI)     |           | aOR (95% CI)    |                    |
| <b>Any Hypertensive Disorder</b> | 16542 (7.5)            | 158 (8.9) | 1.23(1.03-1.48)* | 0.022     | 93 (8.5)        | 1.21(0.96-1.53)    |
| <b>Gestational Hypertension</b>  | 5381 (2.4)             | 43 (2.4)  | 1.04(0.75-1.45)  | 0.817     | 22 (2.0)        | 0.90(0.57-1.43)    |
| <b>Mild Preeclampsia</b>         | 6445 (2.9)             | 68 (3.8)  | 1.42 (1.10-1.84) | 0.007     | 42 (3.8)        | 1.44(1.04-2.00)*** |
| <b>Severe Preeclampsia</b>       | 4330 (1.9)             | 46 (2.6)  | 1.30(0.97-1.75)  | 0.081     | 29 (2.6)        | 1.32(0.91-1.92)    |

## Hypertensive pregnancy complications in women with epilepsy

|                                 |            |          |                   |       |          |                 |
|---------------------------------|------------|----------|-------------------|-------|----------|-----------------|
| <b>Early Onset Preeclampsia</b> | 1299 (0.6) | 19 (1.1) | 1.69(1.01-2.82)** | 0.047 | 11 (1.0) | 1.67(0.86-3.23) |
| <b>HELLP</b>                    | 518 (0.2)  | 6 (0.3)  | 1.18(0.44-3.17)   | 0.743 | 2 (0.2)  | 0.97(0.24-3.91) |
| <b>Eclampsia</b>                | 191 (0.1)  | 3 (0.2)  | 2.18(0.69-6.84)   | 0.183 | 2 (0.2)  | 2.35(0.58-9.49) |

WWE = Women with Epilepsy

AED = Antiepileptic Drug

aOR = Adjusted Odds Ratio (Adjusted for maternal age, Educational level, Multifetal pregnancy, Other relevant chronic disease, Folic acid supplementation)

95% CI = 95% Confidence Interval

\*Not significant in sensitivity analyses when including BMI >30kg/m<sup>2</sup>

\*\*Not significant in sensitivity analyses when including smoking or BMI >30kg/m<sup>2</sup>

\*\*\* Not significant in sensitivity analyses when including other relevant diseases

The risk of mild preeclampsia was significantly increased in WWE (aOR: 1.4, 95% CI: 1.1-1.8) and in WWE with AED exposure (aOR: 1.4, 95% CI: 1.0-2.0) compared to women without epilepsy. For WWE without AED the risk of mild preeclampsia was not significantly increased although the prevalence was the same as for both WWE and WWE with AEDs. For WWE there was a marginally significant risk of early onset preeclampsia (aOR: 1.7, 95% CI: 1.0-2.8). This risk disappeared after stratification and when including smoking or other relevant chronic diseases in sensitivity analyses. Mild preeclampsia was therefore the only specified hypertensive disorder increased in WWE. There was no significant difference for any of the outcomes when WWE with AEDs were compared to WWE without AED. There was no significantly increased risk of gestational hypertension, severe preeclampsia, HELLP or eclampsia when WWE, WWE with and WWE without AED were compared to women without epilepsy.

WWE with valproate monotherapy had an increased risk of any hypertensive complication (aOR: 2.9, 95% CI: 1.4-6.4), gestational hypertension (aOR: 3.3, 95% CI: 1.0-10.8), and mild preeclampsia (aOR: 3.3, 95% CI: 1.2-9.4) compared to women without epilepsy (Table 3).

Table 3. Hypertensive pregnancy complications in WWE with specified AEDs.

| N=223440 | Women without Epilepsy | WWE with lamotrigine | WWE with carbamazepine |
|----------|------------------------|----------------------|------------------------|
|          |                        | N=221662             | N=280                  |



## Hypertensive pregnancy complications in women with epilepsy

|                                  | N (%)       | N (%)    | aOR (95% CI)    | p-value | N (%)   | aOR (95% CI)      | p-value | N (%)   |
|----------------------------------|-------------|----------|-----------------|---------|---------|-------------------|---------|---------|
| <b>Any Hypertensive Disorder</b> | 16542 (7.5) | 25 (8.9) | 1.20(0.76-1.88) | 0.434   | 7 (7.4) | 0.97(0.42-2.25)   | 0.946   | 7 (9.9) |
| <b>Gestational Hypertension</b>  | 5381 (2.4)  | 7 (2.5)  | 1.07(0.48-2.42) | 0.865   | 1 (1.1) | 0.48(0.07-3.44)   | 0.462   | 2 (2.8) |
| <b>Mild Preeclampsia</b>         | 6445 (2.9)  | 11 (3.8) | 1.41(0.75-2.66) | 0.291   | 2 (2.1) | 0.85(0.21-3.49)   | 0.824   | 3 (4.2) |
| <b>Severe Preeclampsia</b>       | 4330 (1.9)  | 6 (2.1)  | 1.21(0.50-2.53) | 0.783   | 4 (4.3) | 2.23(0.81-6.12)   | 0.120   | 3 (4.2) |
| <b>Early Onset Preeclampsia</b>  | 1299 (0.6)  | 3 (1.1)  | 1.45(0.36-5.87) | 0.602   | 2 (2.1) | 4.04(0.98-16.76)  | 0.054   | 2 (2.8) |
| <b>HELLP</b>                     | 518 (0.2)   | -        | -               | -       | 2 (2.1) | 5.02(0.69-36.36)  | 0.11    | -       |
| <b>Eclampsia</b>                 | 191 (0.1)   | -        | -               | -       | 1 (1.1) | 12.47(1.73-89.91) | 0.078   | -       |

WWE = Women with Epilepsy

AED = Antiepileptic Drug

OR = Odds Ratio

aOR = Adjusted Odds Ratio (Adjusted for maternal age, Educational level, Multifetal pregnancy, Pre-existing diseases, Folic acid supplementation)

95% CI = 95% Confidence Interval

\*Not significant in sensitivity analyses when including BMI >30kg/m<sup>2</sup>

\*\*Not significant in sensitivity analyses when including smoking or BMI >30kg/m<sup>2</sup>

There was no increased risk of hypertensive complications for any other AEDs used in monotherapy.

The association between early onset preeclampsia and WWE disappeared when applying sensitivity analyses for smoking (182 478 women). Sensitivity analyses for BMI >30kg/m<sup>2</sup> included 60 740 women and the association for any hypertensive disorder disappeared for WWE, while the risk of mild preeclampsia increased (aOR: 1.8, 95% CI: 1.1-2.9). All increased risks for WWE with valproate disappeared when sensitivity analyses with BMI >30kg/m<sup>2</sup> was performed. Separate analyses of women with BMI >30kg/m<sup>2</sup> only, showed no significant differences for any of the outcome variables when WWE, WWE with AED, and WWE without AED were compared to women without epilepsy. For women with BMI >30kg/m<sup>2</sup>, WWE with valproate had a higher prevalence of mild preeclampsia (16.7 %) than women without epilepsy (6.7 %). This difference was not significant, but the number of cases was low. BMI >30kg/m<sup>2</sup> and other relevant chronic diseases had no significant interactions with epilepsy in logistic regression analyses. However, these variables had more impact on all hypertensive outcomes than a diagnosis of epilepsy. The impact of standard folic acid and of high-dose folic acid supplementation was examined in all population subcategories. There

## Hypertensive pregnancy complications in women with epilepsy

1  
2  
3 were no significant differences among WWE for any of the hypertensive outcomes between  
4  
5 use and no use of such supplementations.

6  
7 When AED use in NorDP data was assessed one and three months before conception, the total  
8  
9 AED population remained unchanged. 95% of WWE with AED in NorPD had more than one  
10  
11 dispensation during pregnancy, illustrating continuous use throughout pregnancy as one  
12  
13 dispensation usually corresponds to more than three months use.  
14  
15  
16  
17  
18  
19  
20  
21  
22  
23  
24  
25  
26  
27  
28  
29  
30  
31  
32  
33  
34  
35  
36  
37  
38  
39  
40  
41  
42  
43  
44  
45  
46  
47  
48  
49  
50  
51  
52  
53  
54  
55  
56  
57  
58  
59  
60

For peer review only

Hypertensive pregnancy complications in women with epilepsy

## Discussion

We found an increased risk of mild preeclampsia in WWE. The specified newer AEDs, lamotrigine and levetiracetam, used in monotherapy did not predispose for this complication. WWE on valproate monotherapy was significantly associated with mild preeclampsia, in contrast to other AEDs. WWE, with and without AEDs, did not have an increased risk of gestational hypertension, severe preeclampsia, early onset preeclampsia, HELLP or eclampsia when compared to women without epilepsy.

The present study shows that most WWE, and in particular when treated with the newer AEDs, do not develop hypertensive complications. WWE with AED and WWE without AED had the same prevalence of mild preeclampsia but only WWE without AED had a significantly increased risk. This probably reflects marginal differences influenced by sample size. Cardiovascular risk factors (smoking, BMI > 30kg/m<sup>2</sup>, pre-existing kidney disease, hypertension and diabetes) were relevant for hypertensive complications in WWE. The mechanism for the increased risk of hypertensive complications in WWE in first pregnancies could therefore be partly mediated by modifiable external risk factors and comorbidity.

The specific risk in WWE on valproate was linked to high BMI. Weight gain and metabolic syndrome represent side-effects of valproate.<sup>(16)</sup> Our study does not support any additional mechanism for valproate associated mild preeclampsia. When pregnancies with BMI > 30 kg/m<sup>2</sup> were analysed separately, WWE with valproate had a high prevalence of mild preeclampsia, but the increased risk was not significant, possibly due to few cases. A previous study showed increased risk of preeclampsia in women on valproate but this was not confirmed by later studies.<sup>(3, 12, 13)</sup> Valproate can induce endocrine changes and polycystic ovary syndrome in WWE and polycystic ovary syndrome is associated with hypertensive pregnancy complications.<sup>(16, 20-22)</sup> Polycystic ovary syndrome is also associated with overweight so endocrine factors could be important for our findings. Valproate increases the

Hypertensive pregnancy complications in women with epilepsy

1  
2  
3 risk of malformations in children exposed during pregnancy.<sup>(6, 23)</sup> Because of this, as well as  
4  
5 delayed neurodevelopment, The European Medicines Agency has strengthened the advice not  
6  
7 to prescribe valproate to WWE in fertile age.<sup>(24)</sup> Valproate is therefore not first line treatment  
8  
9 in pregnancy. The observed valproate associated mild preeclampsia could represent bias  
10  
11 through confounding by indication, although we would expect valproate to be avoided in  
12  
13 women without other risk factors than epilepsy.

14  
15 The newer AEDs, lamotrigine and levetiracetam, were not associated with increased risk of  
16  
17 mild preeclampsia, and lamotrigine did not increase hypertensive pregnancy complications in  
18  
19 general. A small study has previously reported an increased risk of preeclampsia in WWE on  
20  
21 lamotrigine.<sup>(3)</sup> Lamotrigine has been considered a preferred option for WWE in need of AED  
22  
23 treatment because children exposed to lamotrigine in pregnancy have a lower rate of  
24  
25 malformations and better cognitive function than after exposure to other AEDs.<sup>(5, 6, 8)</sup> The  
26  
27 combination of a low rate of adverse fetal effects and no increased risk of hypertensive  
28  
29 complications supports the use of lamotrigine in WWE before and during pregnancy.

30  
31 Levetiracetam is a potent, broad-spectrum AED with low rate of adverse fetal outcomes.<sup>(5)</sup>  
32  
33 Levetiracetam use among pregnant WWE is increasing, but levetiracetam is less studied than  
34  
35 lamotrigine and maternal safety during pregnancy is not well documented.<sup>(5, 6, 25)</sup> To our  
36  
37 knowledge, there are no previous studies on hypertensive complications in WWE with  
38  
39 levetiracetam in pregnancy.

40  
41 Mild, but not more severe preeclampsia was increased among WWE. Proactive management  
42  
43 and close surveillance of WWE could explain why the mild disease did not proceed further.  
44  
45 Similarly, the close surveillance of WWE could have increased the detection of mild  
46  
47 preeclampsia. Ascertainment bias may have influenced other outcomes as well. Alternatively,  
48  
49 mild and severe hypertensive complications in pregnancies could have different underlying  
50  
51 pathophysiological mechanisms in WWE.  
52  
53  
54  
55  
56  
57  
58  
59  
60

## Hypertensive pregnancy complications in women with epilepsy

1  
2  
3 Strengths of our study are that we have analysed first pregnancies only, have specified the  
4 types of hypertensive complications, and have analysed WWE on specific AEDs in  
5 monotherapy only. Parity is a complex variable in reproductive epidemiology and may lead to  
6 bias as the risk of hypertensive complications changes significantly in subsequent  
7 pregnancies.<sup>(26-28)</sup> Our large and unselected nationwide cohort enabled assessment of effects  
8 of individual AEDs in monotherapy. Data was linked to the NorPD that showed the exact  
9 drug dispensation during pregnancy. The registration and standardized data collection in the  
10 national databases that were used provide information of high validity and include important  
11 possible confounders for hypertensive disorders.<sup>(3, 29)</sup> The prevalence of WWE in our  
12 population was 0.79 % and the incidence of preeclampsia was 5.4 %, both in accordance with  
13 previous population-based studies.<sup>(1, 2, 4, 14, 30, 31)</sup>

14  
15 A limitation of this study was the possible inclusion of previous and non-active epilepsy, and  
16 also of women with undefined seizures in the epilepsy group. This could have increased the  
17 total epilepsy population and thereby masking some effects in our group with untreated  
18 epilepsy. The MBRN did not provide data on type of epilepsy or seizure activity. However, a  
19 small study did not find any association between seizure activity and hypertensive  
20 complications in pregnancy.<sup>(3)</sup> Women without epilepsy but using AEDs for other conditions  
21 were not excluded in our study. This group constituted 0.1 % in the control population and did  
22 not affect the outcomes. Psychiatric and pain conditions are the main reasons for AED use in  
23 women without epilepsy. NorPD records dispensed medications which may leave room for  
24 variation in actual compliance. As 95% of WWE with AED collected more than one  
25 dispensation during their pregnancy, we presume that the patients used their AED as  
26 prescribed.

27  
28 BMI above or below 30 kg/m<sup>2</sup> influenced the results for WWE. MBRN has only registered  
29 BMI since 2006, thus it was not possible to control for this variable in the complete

## Hypertensive pregnancy complications in women with epilepsy

1  
2  
3 population. A previous study has indicated an increased risk for preeclampsia in WWE with  
4 BMI > 25 kg/m<sup>2</sup>.<sup>(32)</sup> High BMI represents a risk factor for hypertensive disorders and there is a  
5 global rise in BMI in young women.<sup>(33)</sup> However, a previous study on MBRN data has shown  
6 a slight decrease of preeclampsia in the time period for our study.<sup>(30)</sup> A decrease in  
7 preeclampsia is most likely also affecting WWE and thereby possibly narrowing the  
8 differences between WWE and women without epilepsy.  
9

10  
11 HELLP, eclampsia and early onset preeclampsia are rare hypertensive manifestations. Lack of  
12 events in some of our subgroups can be insufficient to prove significance, despite our large  
13 sample size. Differences in statistical outcome across treatment subcategories for WWE can  
14 similarly have been influenced by sample size. Our study lacks information on ethnicity and  
15 marital status, not released by MBRN due to ethical considerations.  
16  
17  
18  
19  
20  
21  
22  
23  
24  
25  
26  
27  
28  
29  
30  
31  
32  
33  
34  
35  
36  
37  
38  
39  
40  
41  
42  
43  
44  
45  
46  
47  
48  
49  
50  
51  
52  
53  
54  
55  
56  
57  
58  
59  
60

Hypertensive pregnancy complications in women with epilepsy

## Conclusion

Mild preeclampsia was the only hypertensive complication to be increased in first pregnancies of WWE. This is of clinical importance for WWE since mild preeclampsia, in contrast to severe forms of preeclampsia, is not associated with increased maternal or fetal morbidity or mortality in pregnancy.<sup>(19)</sup> WWE have previously been considered as high risk parturients by having a significant increase in several adverse pregnancy outcomes, including hypertensive complications.<sup>(2,3,10,11)</sup> Our study shows that most WWE do not develop hypertensive complications. WWE on the newer AEDs, lamotrigine and levetiracetam in particular, do not have an additional risk for severe hypertensive complications. A healthcare system focusing on risk assessment, prevention of modifiable risk factors and modern treatment options should be the key to a further decrease in hypertensive complications in pregnant WWE.

## Acknowledgement:

This research was kindly supported by the Fund of Torbjørg Hauge's Legacy. We are grateful for data provision and linkage that was performed by Medical Birth Registry of Norway, Norwegian Prescription Database and Statistics Norway.

## Details of Ethics Approval:

This study was approved by the Regional Ethics Committee (REK 2013/186) and the Norwegian Data Protection Authority. The MBRN, NorPD and Statistics Norway approved the use of data. Use of Norwegian national register data does not require consent from the participants.

## Contribution to Authorship:

KCD conceived and designed the study, analysed the data and drafted the manuscript. IB provided input on design, interpretation and presentation of the study. NHM provided input on design and analyses, interpretation of analyses and critically revised the manuscript. NEG

Hypertensive pregnancy complications in women with epilepsy

conceived and designed the study, and critically revised the presentation and discussion of the results in the manuscript. The final manuscript was approved by all authors.

**Data sharing statement:**

Data from Medical Birth Registry of Norway and Norwegian Prescription Database are available at Norwegian Institute of Public Health.

For peer review only



## Hypertensive pregnancy complications in women with epilepsy

## REFERENCES

1. Artama M, Gissler M, Malm H, Ritvanen A, Drug, Pregnancy G. Effects of maternal epilepsy and antiepileptic drug use during pregnancy on perinatal health in offspring: nationwide, retrospective cohort study in Finland. *Drug safety*. 2013;36(5):359-69.
2. Borthen I, Eide MG, Veiby G, Daltveit AK, Gilhus NE. Complications during pregnancy in women with epilepsy: population-based cohort study. *BJOG : an international journal of obstetrics and gynaecology*. 2009;116(13):1736-42.
3. Borthen I, Eide MG, Daltveit AK, Gilhus NE. Obstetric outcome in women with epilepsy: a hospital-based, retrospective study. *BJOG : an international journal of obstetrics and gynaecology*. 2011;118(8):956-65.
4. Richmond JR, Krishnamoorthy P, Andermann E, Benjamin A. Epilepsy and pregnancy: an obstetric perspective. *American journal of obstetrics and gynecology*. 2004;190(2):371-9.
5. Weston J, Bromley R, Jackson CF, Adab N, Clayton-Smith J, Greenhalgh J, et al. Monotherapy treatment of epilepsy in pregnancy: congenital malformation outcomes in the child. *The Cochrane database of systematic reviews*. 2016;11:CD010224.
6. Bromley R, Weston J, Adab N, Greenhalgh J, Sanniti A, McKay AJ, et al. Treatment for epilepsy in pregnancy: neurodevelopmental outcomes in the child. *The Cochrane database of systematic reviews*. 2014(10):CD010236.
7. Gerard EE, Meador KJ. Managing Epilepsy in Women. *Continuum*. 2016;22(1 Epilepsy):204-26.
8. Tomson T, Xue H, Battino D. Major congenital malformations in children of women with epilepsy. *Seizure : the journal of the British Epilepsy Association*. 2015;28:46-50.
9. Say L, Chou D, Gemmill A, Tuncalp O, Moller AB, Daniels J, et al. Global causes of maternal death: a WHO systematic analysis. *The Lancet Global health*. 2014;2(6):e323-33.
10. MacDonald SC, Bateman BT, McElrath TF, Hernandez-Diaz S. Mortality and Morbidity During Delivery Hospitalization Among Pregnant Women With Epilepsy in the United States. *JAMA neurology*. 2015;72(9):981-8.
11. Viale L, Allotey J, Cheong-See F, Arroyo-Manzano D, McCorry D, Bagary M, et al. Epilepsy in pregnancy and reproductive outcomes: a systematic review and meta-analysis. *Lancet*. 2015.
12. Veiby G, Daltveit AK, Engelsen BA, Gilhus NE. Pregnancy, delivery, and outcome for the child in maternal epilepsy. *Epilepsia*. 2009;50(9):2130-9.
13. Pilo C, Wide K, Winbladh B. Pregnancy, delivery, and neonatal complications after treatment with antiepileptic drugs. *Acta obstetrica et gynecologica Scandinavica*. 2006;85(6):643-6.
14. Viinikainen K, Heinonen S, Eriksson K, Kalviainen R. Community-based, prospective, controlled study of obstetric and neonatal outcome of 179 pregnancies in women with epilepsy. *Epilepsia*. 2006;47(1):186-92.
15. Razaz N, Tomson T, Wikstrom AK, Cnattingius S. Association Between Pregnancy and Perinatal Outcomes Among Women With Epilepsy. *JAMA neurology*. 2017;74(8):983-91.
16. Belcastro V, D'Egidio C, Striano P, Verrotti A. Metabolic and endocrine effects of valproic acid chronic treatment. *Epilepsy research*. 2013;107(1-2):1-8.
17. Vajda FJ, O'Brien T, Lander C, Graham J, Eadie M. The efficacy of the newer antiepileptic drugs in controlling seizures in pregnancy. *Epilepsia*. 2014;55(8):1229-34.
18. Nicholas JM, Ridsdale L, Richardson MP, Ashworth M, Gulliford MC. Trends in antiepileptic drug utilisation in UK primary care 1993-2008: cohort study using the General

## Hypertensive pregnancy complications in women with epilepsy

- Practice Research Database. *Seizure : the journal of the British Epilepsy Association*. 2012;21(6):466-70.
19. Hypertension in pregnancy. Report of the American College of Obstetricians and Gynecologists' Task Force on Hypertension in Pregnancy. *Obstetrics and gynecology*. 2013;122(5):1122-31.
20. Hu X, Wang J, Dong W, Fang Q, Hu L, Liu C. A meta-analysis of polycystic ovary syndrome in women taking valproate for epilepsy. *Epilepsy research*. 2011;97(1-2):73-82.
21. Qin JZ, Pang LH, Li MJ, Fan XJ, Huang RD, Chen HY. Obstetric complications in women with polycystic ovary syndrome: a systematic review and meta-analysis. *Reproductive biology and endocrinology : RB&E*. 2013;11:56.
22. Isojarvi JI, Laatikainen TJ, Pakarinen AJ, Juntunen KT, Myllyla VV. Polycystic ovaries and hyperandrogenism in women taking valproate for epilepsy. *The New England journal of medicine*. 1993;329(19):1383-8.
23. Tomson T, Battino D, Bonizzoni E, Craig J, Lindhout D, Sabers A, et al. Dose-dependent risk of malformations with antiepileptic drugs: an analysis of data from the EURAP epilepsy and pregnancy registry. *Lancet neurology*. 2011;10(7):609-17.
24. Agency EM. CMDh agrees to strengthen warnings on the use of valproate medicines in women and girls: European Medicines Agency; 2014 [cited 2017]. Available from: [http://www.ema.europa.eu/ema/index.jsp?curl=pages/news\\_and\\_events/news/2014/11/news\\_detail\\_002220.jsp&mid=WC0b01ac058004d5c1](http://www.ema.europa.eu/ema/index.jsp?curl=pages/news_and_events/news/2014/11/news_detail_002220.jsp&mid=WC0b01ac058004d5c1).
25. Eurap Study G. Utilization of antiepileptic drugs during pregnancy: comparative patterns in 38 countries based on data from the EURAP registry. *Epilepsia*. 2009;50(10):2305-9.
26. Wilcox AJ. *Fertility and Pregnancy : An Epidemiologic Perspective*. Oxford: Oxford University Press, USA; 2010.
27. Ebbing C, Rasmussen S, Skjaerven R, Irgens LM. Risk factors for recurrence of hypertensive disorders of pregnancy, a population-based cohort study. *Acta obstetrica et gynecologica Scandinavica*. 2017;96(2):243-50.
28. Hernandez-Diaz S, Toh S, Cnattingius S. Risk of pre-eclampsia in first and subsequent pregnancies: prospective cohort study. *Bmj*. 2009;338:b2255.
29. Thomsen LC, Klungsoyr K, Roten LT, Tappert C, Araya E, Baerheim G, et al. Validity of the diagnosis of pre-eclampsia in the Medical Birth Registry of Norway. *Acta obstetrica et gynecologica Scandinavica*. 2013.
30. Klungsoyr K, Morken NH, Irgens L, Vollset SE, Skjaerven R. Secular trends in the epidemiology of pre-eclampsia throughout 40 years in Norway: prevalence, risk factors and perinatal survival. *Paediatric and perinatal epidemiology*. 2012;26(3):190-8.
31. Abalos E, Cuesta C, Grosso AL, Chou D, Say L. Global and regional estimates of preeclampsia and eclampsia: a systematic review. *European journal of obstetrics, gynecology, and reproductive biology*. 2013;170(1):1-7.
32. Kolstad E, Veiby G, Gilhus NE, Bjork M. Overweight in epilepsy as a risk factor for pregnancy and delivery complications. *Epilepsia*. 2016;57(11):1849-57.
33. WHO. Obesity Health Topic: World Health Organization; 2017 [updated 2017; cited 2017 June 2017]. Available from: <http://www.who.int/topics/obesity/en/>.

## STROBE Statement—checklist of items that should be included in reports of observational studies

|                              | Item No. | Recommendation                                                                                                                                                                                                                                                                                                      | Page No. | Relevant text from manuscript |
|------------------------------|----------|---------------------------------------------------------------------------------------------------------------------------------------------------------------------------------------------------------------------------------------------------------------------------------------------------------------------|----------|-------------------------------|
| <b>Title and abstract</b>    | 1        | (a) Indicate the study's design with a commonly used term in the title or the abstract                                                                                                                                                                                                                              | 1        |                               |
|                              |          | (b) Provide in the abstract an informative and balanced summary of what was done and what was found                                                                                                                                                                                                                 | 2        |                               |
| <b>Introduction</b>          |          |                                                                                                                                                                                                                                                                                                                     |          |                               |
| Background/rationale         | 2        | Explain the scientific background and rationale for the investigation being reported                                                                                                                                                                                                                                | 4        |                               |
| Objectives                   | 3        | State specific objectives, including any prespecified hypotheses                                                                                                                                                                                                                                                    | 4        |                               |
| <b>Methods</b>               |          |                                                                                                                                                                                                                                                                                                                     |          |                               |
| Study design                 | 4        | Present key elements of study design early in the paper                                                                                                                                                                                                                                                             | 5        |                               |
| Setting                      | 5        | Describe the setting, locations, and relevant dates, including periods of recruitment, exposure, follow-up, and data collection                                                                                                                                                                                     | 5        |                               |
| Participants                 | 6        | (a) <i>Cohort study</i> —Give the eligibility criteria, and the sources and methods of selection of participants. Describe methods of follow-up                                                                                                                                                                     | 5        |                               |
|                              |          | <i>Case-control study</i> —Give the eligibility criteria, and the sources and methods of case ascertainment and control selection. Give the rationale for the choice of cases and controls<br><i>Cross-sectional study</i> —Give the eligibility criteria, and the sources and methods of selection of participants |          |                               |
| Variables                    | 7        | (b) <i>Cohort study</i> —For matched studies, give matching criteria and number of exposed and unexposed                                                                                                                                                                                                            |          |                               |
|                              |          | <i>Case-control study</i> —For matched studies, give matching criteria and the number of controls per case                                                                                                                                                                                                          |          |                               |
|                              |          | Clearly define all outcomes, exposures, predictors, potential confounders, and effect modifiers. Give diagnostic criteria, if applicable                                                                                                                                                                            | 5-6      |                               |
| Data sources/<br>measurement | 8*       | For each variable of interest, give sources of data and details of methods of assessment (measurement). Describe comparability of assessment methods if there is more than one group                                                                                                                                | 5-6      |                               |
| Bias                         | 9        | Describe any efforts to address potential sources of bias                                                                                                                                                                                                                                                           | 5-7      |                               |
| Study size                   | 10       | Explain how the study size was arrived at                                                                                                                                                                                                                                                                           | 4-5      |                               |

Continued on next page

|                        |     |                                                                                                                                                                                                                        |                   |
|------------------------|-----|------------------------------------------------------------------------------------------------------------------------------------------------------------------------------------------------------------------------|-------------------|
| Quantitative variables | 11  | Explain how quantitative variables were handled in the analyses. If applicable, describe which groupings were chosen and why                                                                                           | 7                 |
| Statistical methods    | 12  | (a) Describe all statistical methods, including those used to control for confounding                                                                                                                                  | 7                 |
|                        |     | (b) Describe any methods used to examine subgroups and interactions                                                                                                                                                    | 7-8               |
|                        |     | (c) Explain how missing data were addressed                                                                                                                                                                            | 8                 |
|                        |     | (d) <i>Cohort study</i> —If applicable, explain how loss to follow-up was addressed                                                                                                                                    | NA                |
|                        |     | (e) <i>Case-control study</i> —If applicable, explain how matching of cases and controls was addressed<br><i>Cross-sectional study</i> —If applicable, describe analytical methods taking account of sampling strategy | 8                 |
|                        |     | (e) Describe any sensitivity analyses                                                                                                                                                                                  | 8                 |
| <b>Results</b>         |     |                                                                                                                                                                                                                        |                   |
| Participants           | 13* | (a) Report numbers of individuals at each stage of study—eg numbers potentially eligible, examined for eligibility, confirmed eligible, included in the study, completing follow-up, and analysed                      | 9                 |
|                        |     | (b) Give reasons for non-participation at each stage                                                                                                                                                                   | NA                |
|                        |     | (c) Consider use of a flow diagram                                                                                                                                                                                     | NA                |
| Descriptive data       | 14* | (a) Give characteristics of study participants (eg demographic, clinical, social) and information on exposures and potential confounders                                                                               | 9 (Table 1)       |
|                        |     | (b) Indicate number of participants with missing data for each variable of interest                                                                                                                                    | 9 (Table 1)       |
|                        |     | (c) <i>Cohort study</i> —Summarise follow-up time (eg, average and total amount)                                                                                                                                       | NA                |
| Outcome data           | 15* | <i>Cohort study</i> —Report numbers of outcome events or summary measures over time                                                                                                                                    | 9 (Table 2 and 3) |
|                        |     | <i>Case-control study</i> —Report numbers in each exposure category, or summary measures of exposure                                                                                                                   |                   |
|                        |     | <i>Cross-sectional study</i> —Report numbers of outcome events or summary measures                                                                                                                                     |                   |
| Main results           | 16  | (a) Give unadjusted estimates and, if applicable, confounder-adjusted estimates and their precision (eg, 95% confidence interval). Make clear which confounders were adjusted for and why they were included           | (Table 2 and 3)   |
|                        |     | (b) Report category boundaries when continuous variables were categorized                                                                                                                                              | NA                |
|                        |     | (c) If relevant, consider translating estimates of relative risk into absolute risk for a meaningful time period                                                                                                       | NA                |

Continued on next page

|                          |    |                                                                                                                                                                            |    |
|--------------------------|----|----------------------------------------------------------------------------------------------------------------------------------------------------------------------------|----|
| Other analyses           | 17 | Report other analyses done—eg analyses of subgroups and interactions, and sensitivity analyses                                                                             | 10 |
| <b>Discussion</b>        |    |                                                                                                                                                                            |    |
| Key results              | 18 | Summarise key results with reference to study objectives                                                                                                                   | 12 |
| Limitations              | 19 | Discuss limitations of the study, taking into account sources of potential bias or imprecision. Discuss both direction and magnitude of any potential bias                 | 14 |
| Interpretation           | 20 | Give a cautious overall interpretation of results considering objectives, limitations, multiplicity of analyses, results from similar studies, and other relevant evidence | 16 |
| Generalisability         | 21 | Discuss the generalisability (external validity) of the study results                                                                                                      | 16 |
| <b>Other information</b> |    |                                                                                                                                                                            |    |
| Funding                  | 22 | Give the source of funding and the role of the funders for the present study and, if applicable, for the original study on which the present article is based              | 16 |

\*Give information separately for cases and controls in case-control studies and, if applicable, for exposed and unexposed groups in cohort and cross-sectional studies.

**Note:** An Explanation and Elaboration article discusses each checklist item and gives methodological background and published examples of transparent reporting. The STROBE checklist is best used in conjunction with this article (freely available on the Web sites of PLoS Medicine at <http://www.plosmedicine.org/>, Annals of Internal Medicine at <http://www.annals.org/>, and Epidemiology at <http://www.epidem.com/>). Information on the STROBE Initiative is available at [www.strobe-statement.org](http://www.strobe-statement.org).

# BMJ Open

## Hypertensive pregnancy complications in women with epilepsy and antiepileptic drugs: a population-based cohort study of first pregnancies in Norway

|                                 |                                                                                                                                                                                                                                                                                                                                                                                                                                                                                                                                                                                                   |
|---------------------------------|---------------------------------------------------------------------------------------------------------------------------------------------------------------------------------------------------------------------------------------------------------------------------------------------------------------------------------------------------------------------------------------------------------------------------------------------------------------------------------------------------------------------------------------------------------------------------------------------------|
| Journal:                        | <i>BMJ Open</i>                                                                                                                                                                                                                                                                                                                                                                                                                                                                                                                                                                                   |
| Manuscript ID                   | bmjopen-2017-020998.R2                                                                                                                                                                                                                                                                                                                                                                                                                                                                                                                                                                            |
| Article Type:                   | Research                                                                                                                                                                                                                                                                                                                                                                                                                                                                                                                                                                                          |
| Date Submitted by the Author:   | 27-Mar-2018                                                                                                                                                                                                                                                                                                                                                                                                                                                                                                                                                                                       |
| Complete List of Authors:       | Danielsson, Kim; Haukeland University Hospital, Department of Obstetrics and Gynecology; University of Bergen, Faculty of Medicine, Department of Clinical Medicine<br>Borthen, Ingrid; University of Bergen, Faculty of Medicine, Department of Clinical Medicine<br>Morken, Nils-Halvdan; University of Bergen, Faculty of Medicine, Department of Clinical Science; Haukeland University Hospital, Department of Obstetrics and Gynecology<br>Gilhus, Nils; University of Bergen, Faculty of Medicine, Department of Clinical Medicine; Haukeland University Hospital, Department of Neurology |
| <b>Primary Subject Heading</b>: | Obstetrics and gynaecology                                                                                                                                                                                                                                                                                                                                                                                                                                                                                                                                                                        |
| Secondary Subject Heading:      | Obstetrics and gynaecology, Epidemiology, Neurology                                                                                                                                                                                                                                                                                                                                                                                                                                                                                                                                               |
| Keywords:                       | Epilepsy < NEUROLOGY, Pregnancy, Antiepileptic drugs, Hypertensive disorder, Preeclampsia, Medical Birth Registry of Norway                                                                                                                                                                                                                                                                                                                                                                                                                                                                       |
|                                 |                                                                                                                                                                                                                                                                                                                                                                                                                                                                                                                                                                                                   |

SCHOLARONE™  
Manuscripts



Hypertensive pregnancy complications in women with epilepsy

# Hypertensive pregnancy complications in women with epilepsy and antiepileptic drugs: a population-based cohort study of first pregnancies in Norway

---

**Kim Christian Danielsson, MD** <sup>a,b</sup>

**Ingrid Borthen, MD, PhD** <sup>b</sup>

**Nils-Halvdan Morken, MD, PhD** <sup>a,c</sup>

**Nils Erik Gilhus, MD, PhD** <sup>b,d</sup>

<sup>a</sup> Department of Obstetrics and Gynecology, Haukeland University Hospital, Bergen, Norway.

<sup>b</sup> Department of Clinical Medicine, University of Bergen, Norway.

<sup>c</sup> Department of Clinical Science, University of Bergen

<sup>d</sup> Department of Neurology, Haukeland University Hospital, Bergen, Norway.

Corresponding author:

Kim Christian Danielsson:

Department of Obstetrics and Gynecology,

Haukeland University Hospital,

Postboks 1400

5021 Bergen, Norway.

E-mail: [kim.christian.danielsson@helse-bergen.no](mailto:kim.christian.danielsson@helse-bergen.no)

Mobile phone: +47 95761169

Telefax: +47 55974968

Short title:

Hypertensive pregnancy complications in women with epilepsy

Word count: 3287

Tables: 3

## Hypertensive pregnancy complications in women with epilepsy

### **Abstract**

#### **Objectives:**

To estimate the risk of hypertensive pregnancy complications in women with epilepsy, with and without antiepileptic drugs, and assess the risk associated with the four most common antiepileptic drugs.

#### **Design:**

A population-based cohort study using linked data from the Medical Birth Registry of Norway and the Norwegian Prescription Database. Women with epilepsy with and without antiepileptic drugs were compared to women without epilepsy.

#### **Setting:**

Norway, 2004-2012.

#### **Participants:**

All first pregnancies of women with epilepsy and women without epilepsy were included.

#### **Primary and secondary outcome measures:**

Main outcome measures were hypertensive pregnancy complications: a compound variable of any hypertensive disorder, gestational hypertension, mild preeclampsia, severe preeclampsia, early onset preeclampsia, eclampsia, and HELLP syndrome.

#### **Results:**

In total 1778 pregnancies in women with epilepsy and 221 662 in women without epilepsy were analysed. 682 of the women with epilepsy used antiepileptic drugs, the most common in monotherapy being: lamotrigine (N=280), carbamazepine (N=94), levetiracetam (N=71), and valproate (N=51). There was an increased risk of any hypertensive disorder in women with epilepsy (adjusted odds ratio [aOR]: 1.2, 95% CI 1.0-1.5) and in the subcategory using valproat (aOR: 2.9: 95% CI: 1.3-6.4). The most frequent hypertensive complication was mild



Hypertensive pregnancy complications in women with epilepsy

preeclampsia and the risk was increased in women with epilepsy (aOR: 1.4, 95% CI: 1.1-1.8) and women with epilepsy with valproate (aOR: 3.3; 95% CI: 1.2-9.4).

### **Conclusions:**

Women with epilepsy have an increased risk of mild preeclampsia, but not for the severe types of hypertensive pregnancy complications. Lamotrigine and levetiracetam do not predispose for mild preeclampsia, whereas valproate was associated with an increased risk of mild preeclampsia.

### **Strengths and limitations of this study:**

- + Large population based national cohort with data from compulsory and reliable national health registries
- + Only first pregnancies were included to avoid bias from recurrent events
- + We have studied type and severity of hypertensive complications in pregnancy and associations with use of specific antiepileptic drugs.
- We had no data on type of epilepsy or seizure activity

### **Funding**

This research was kindly supported by the Fund of Torbjørn Hauge's Legacy.

### **Competing interests:**

None of the authors have any conflict of interest to disclose.

## Hypertensive pregnancy complications in women with epilepsy

### Introduction

Epilepsy is the most common neurologic disorder requiring continuous drug treatment during pregnancy, and 30 - 70% of pregnant women with epilepsy (WWE) use antiepileptic drugs (AEDs).<sup>(1-4)</sup> Studies have focused on consequences of epilepsy and maternal AED use during pregnancy for fetal malformations and child development.<sup>(5-8)</sup> In contrast, potential effects of epilepsy and specific AEDs on the pregnancy have been less studied. Optimal therapy in epilepsy is a balance between seizure suppression and side-effects. For women in fertile age, potential AED effects for the fetus as well as on the pregnancy should be of the highest interest.

Hypertensive pregnancy complications include multiple diagnoses with different risks and implications for fetal and maternal outcomes. Hypertensive pregnancy complications represent a major contributor to global maternal mortality.<sup>(9)</sup> Most previous studies, including a recent meta-analysis, have found an increased risk of total hypertensive complications in WWE but these studies have not differentiated between the specific hypertensive disorders and therefore the burden of disease in WWE is uncertain.<sup>(2, 3, 10-14)</sup> Studies on the effect of specific AEDs on pregnant women with epilepsy have been limited by small sample size, selection bias, and lack of detailed information on hypertensive disorders.<sup>(2, 3, 10-13, 15)</sup>

Recently, a small cohort study found an increased risk of preeclampsia in WWE with the newer AED lamotrigine.<sup>(3)</sup> Some studies have also suggested an increased preeclampsia risk with the older AEDs, carbamazepine and valproate.<sup>(12, 13)</sup> Many AED work by blocking ion channels, enhancing gamma-aminobutyric acid receptors or blocking glutamate receptors, and they stabilize and inactivate neurons. Valproate can induce endocrine changes and metabolic syndrome in WWE and possibly also hypertensive complications in pregnancy.<sup>(16)</sup> No other AED mode of action is known to pose any increased risk for hypertension or preeclampsia.

Hypertensive pregnancy complications in women with epilepsy

Preferred drugs and drugs to be avoided in pregnancy have not been identified, despite an increased use in young women of the newer AEDs lamotrigine and levetiracetam.<sup>(17, 18)</sup>

The aim of the present study was to estimate the risk of specified hypertensive pregnancy complications in WWE with and without use of AEDs, and to specifically define the risk for the four most common AEDs. This is necessary to guide optimal AED treatment in young women before and during pregnancy.

For peer review only

Hypertensive pregnancy complications in women with epilepsy

### Materials and Methods

We used data from the compulsory, population-based Medical Birth Registry of Norway (MBRN) collected during 2004-2012. The notification form of the MBRN was unchanged in that period. MBRN includes data on maternal and paternal social factors, maternal health prior to and during pregnancy including chronic diseases such as epilepsy, complications and interventions during pregnancy and birth, perinatal outcome and complications in the children. Data are prospectively registered throughout pregnancy, delivery and postpartum period. All data are forwarded to the MBRN by the attending midwife or obstetrician. All pregnancies from 12 weeks gestation are recorded. The registry is routinely linked to the National Population Database to ensure notification of all births and deaths in the country. All Norwegian citizens are given a unique Social Security Number that enables linkage of data from various national data sources. Only first time pregnancies were included in this study, all singleton and multiple pregnancies at >22 weeks of gestation.

The Norwegian Prescription Database (NorPD), commenced in 2004, provides detailed data on all medications dispensed from pharmacies by prescription. Mandatory registration in NorPD of every dispensed medical prescription is made by the pharmacist. Statistics Norway provided data on maternal level of education.

Main outcome variables were a compound variable of any hypertensive disorder in pregnancy, gestational hypertension, mild preeclampsia, severe preeclampsia, early onset preeclampsia, eclampsia, and HELLP syndrome (Haemolysis, Elevated Liver enzymes, Low Platelets). Exposure variables were a diagnosis of epilepsy and use of AEDs. All hypertensive disorders, except the compound variable, are reported in MBRN in specified checkboxes. Checkboxes are not mutually exclusive. Therefore, we used the most severe diagnosis to exclude double registration. Gestational hypertension was defined as persisting elevated blood pressure  $\geq 140$  mmHg systolic and/or  $\geq 90$  mmHg diastolic occurring after 20 weeks of

## Hypertensive pregnancy complications in women with epilepsy

1  
2 gestation and without pre-existing hypertension.<sup>(19)</sup> Mild preeclampsia was defined as  
3  
4 persisting elevated blood pressure  $\geq 140$  mmHg systolic and/or  $\geq 90$  mmHg diastolic combined  
5  
6 with proteinuria  $\geq 0,3$ g per 24 hours (equivalent to  $\geq +1$  on urine test strips for protein  
7  
8 excretion) occurring after 20 weeks of gestation. Severe preeclampsia was defined as blood  
9  
10 pressure  $\geq 160/110$  mmHg, clinical symptoms of preeclampsia, protein excretion  $\geq 3$  g per 24  
11  
12 hours or oliguria, and also included all cases of early onset preeclampsia ( $< 34$  weeks),  
13  
14 eclampsia or HELLP syndrome. Eclampsia was defined as generalized seizures occurring  
15  
16 simultaneously with preeclampsia or hypertension and without other cause. Early onset  
17  
18 preeclampsia was defined as preeclampsia with onset before 34 weeks of gestation. The  
19  
20 compound variable of any hypertensive disorder was defined as the presence of any of these  
21  
22 hypertensive disorders. Superimposed preeclampsia in women with pre-gestational  
23  
24 hypertension was not specified but was included in the respective subcategories of  
25  
26 hypertensive complications by severity.  
27  
28  
29

30 Maternal epilepsy was defined by either ticking the specific checkbox in MBRN or adding  
31  
32 this diagnosis in a blank space available for written text. Neither of these provided  
33  
34 information about the type of epilepsy or seizure activity. The diagnosis was based on  
35  
36 previous medical history and medical charts. The epilepsy diagnosis in MBRN has previously  
37  
38 been found to be valid in 92.3 % of cases, having been confirmed in hospital medical  
39  
40 records.<sup>(3)</sup>  
41  
42  
43

44 NorPD provided exact data on dispensed AEDs and high-dose folic acid supplementation  
45  
46 (4mg/day) including type of medication (according to ATC codes), dose, and time of  
47  
48 administration. We defined AED use in pregnancy as dispensed drugs from the pharmacy in  
49  
50 the time period coinciding with gestation, dated by ultrasound assessment. In cases with  
51  
52 missing ultrasound dates, last menstrual period was used. We assessed drug dispensation also  
53  
54 one and three months pre-conception. An a priori decision was made to primarily analyse the  
55  
56  
57  
58  
59  
60

## Hypertensive pregnancy complications in women with epilepsy

four most commonly used AEDs in monotherapy in order to obtain large enough groups and exclude interference of polytherapy. Information about AED use in pregnancy is also recorded in MBRN on the notification form in an available blank space for written text. This information was used to validate the AED use obtained from MBRN compared to NorPD. Positive predictive values for AED data in MBRN were calculated by matching with confirmed AED dispensation in NorPD during pregnancy. The positive predictive values were 0.94 for lamotrigine, 0.82 for carbamazepine, 0.95 for levetiracetam and 0.84 for valproate, providing acceptable registration. When AED use in NorDP data was assessed one and three months before conception, the total AED population remained unchanged. 95% of WWE with AED in NorPD had more than one dispensation during pregnancy, illustrating continuous use throughout pregnancy as one dispensation usually corresponds to more than three months use. Socio-demographic and background data included maternal age ( $\leq 19$  years, 20-24 years, 25-29 years, 30-34 years, 35-39 years and  $\geq 40$  years), maternal educational level ( $\leq 10$  years, 11-13 years,  $\geq 14$  years), other chronic disease (kidney disease, hypertension, diabetes mellitus), multifetal pregnancies, high pre-gestational body mass index (BMI) ( $\text{BMI} \geq 30 \text{kg/m}^2$ ), smoking during pregnancy, and use of folic acid supplementation in standard dose (0,4mg/day). The BMI variable was only available from 2006 onwards. Data on ethnicity and marital status were not available for this study.

We further categorized WWE by AED-treatment; all AEDs, no AEDs, AED polytherapy, and the four most common AEDs. Outcome variables for specific AEDs were analysed only in WWE with monotherapy. WWE using other than the four most common AEDs were identified and excluded from the analyses where appropriate. WWE and all treatment subcategories were compared with women without epilepsy. WWE with AED treatment were also compared to WWE without AEDs.

## Hypertensive pregnancy complications in women with epilepsy

1  
2  
3 For binary outcomes, proportions and crude odds ratios (OR) were calculated using  
4 contingency tables. P-values were calculated using Fisher's exact test. Continuous variables  
5 (background variables) were analysed with independent sample t-tests. Statistical significance  
6 was defined as non-overlapping 95% confidence intervals (95% CI) and two sided p-values <  
7 0.05. All statistical analyses were performed with IBM SPSS (Statistical Package for Social  
8 Sciences) version 22.0 or later.

9  
10  
11 We used logistic regression to adjust for possible confounding by maternal age, educational  
12 level, multifetal pregnancy, use of folic acid supplements, and other relevant chronic diseases  
13 (pre-existing hypertension, pre-existing kidney disease, and pre-existing diabetes mellitus).

14  
15 The covariates BMI (only registered since 2006) and smoking were restrained by missing  
16 cases and therefore studied with stratification-based sensitivity analyses applied on all results  
17 and not included in the final logistic regression models. The impact of other relevant chronic  
18 diseases was similarly analysed further with stratification-based sensitivity analyses.

19  
20  
21 This study was approved by the Regional Ethics Committee (REK 2013/186) and the  
22 Norwegian Data Protection Authority. The MBRN, NorPD and Statistics Norway approved  
23 the use of data. Use of Norwegian national register data does not require consent from the  
24 participants.

### **Patient involvement**

25  
26  
27 The Norwegian Epilepsy Association provided input to the research questions in this study.  
28  
29  
30  
31  
32  
33  
34  
35  
36  
37  
38  
39  
40  
41  
42  
43  
44  
45  
46  
47  
48  
49  
50  
51  
52  
53  
54  
55  
56  
57  
58  
59  
60

## Hypertensive pregnancy complications in women with epilepsy

**Results**

223 440 first time pregnancies were eligible after exclusion of multipara pregnancies (309 364), missing personal identification number (1 514, 0.7% [foreigners or immigrants without residence permit]), and pregnancies <23 gestational weeks (340, 0.2%). There were 1778 WWE (0.79 %), of whom 682 (38.4 % of WWE) used AEDs either in monotherapy (554 women) or in polytherapy (128 women). The most common AEDs used as monotherapy were lamotrigine (280 women, 50.5 % of all monotherapies), carbamazepine (94 women, 17.0 %), levetiracetam (71 women, 12.8 %), and valproate (51 women, 9.2 %). Other AEDs in monotherapy were used by 58 WWE. WWE were younger, had lower educational level, were more often obese, smoked more often, and were more likely to have comorbidity compared to women without epilepsy. All maternal characteristics are shown in Table 1.

**Table 1. Maternal characteristics. First pregnancies as recorded in Medical Birth Registry of Norway (2004-2012).**

| N=223440                 | Women without Epilepsy | WWE        |           | WWE without AED |           | N (%)     |
|--------------------------|------------------------|------------|-----------|-----------------|-----------|-----------|
|                          |                        | N=221662   | N=1778    | N=1096          | p - value |           |
|                          |                        | N (%)      | p - value | N (%)           | p - value |           |
| <b>Maternal age</b>      |                        |            |           |                 |           |           |
| <19 years                | 10519 (4.7)            | 116 (6.5)  | 0.001     | 82 (7.5)        | <0.001    | 34 (0.2)  |
| 20-24 years              | 52 857 (23.8)          | 475 (26.7) | 0.005     | 310 (28.3)      | 0.001     | 165 (0.8) |
| 25-29 years              | 82 004 (37.0)          | 564 (31.7) | <0.001    | 332 (30.3)      | <0.001    | 232 (1.2) |
| 30-34 years              | 55 199 (24.9)          | 466 (26.2) | 0.205     | 273 (24.9)      | 1         | 193 (1.0) |
| 35-39 years              | 17 992 (8.1)           | 124 (7.0)  | 0.083     | 78 (7.1)        | 0.245     | 46 (0.2)  |
| ≥40 years                | 3091 (1.4)             | 33 (1.9)   | 0.099     | 21 (1.9)        | 0.153     | 12 (0.06) |
| <b>Educational level</b> |                        |            |           |                 |           |           |
| 0-10 years               | 31 241 (14.1)          | 367 (20.6) | <0.001    | 219 (20.0)      | <0.001    | 148 (0.7) |
| 11-13 years              | 117 063 (52.8)         | 950 (53.4) | 0.616     | 576 (52.6)      | 0.88      | 374 (2.0) |
| ≥14 years                | 23 732 (10.7)          | 118 (6.6)  | <0.001    | 73 (6.7)        | <0.001    | 45 (0.2)  |
| Other                    | 7 659 (3.5)            | 39 (2.2)   | 0.004     | 29 (2.6)        | 0.162     | 10 (0.05) |
| <b>Fetal plurality</b>   |                        |            |           |                 |           |           |
| Multifetal               | 4 113 (1.9)            | 26 (1.5)   | 0.253     | 21 (1.9)        | 0.837     | 5 (0.03)  |



## Hypertensive pregnancy complications in women with epilepsy

|                                        |                |              |        |            |        |            |
|----------------------------------------|----------------|--------------|--------|------------|--------|------------|
| <b>Gestational age</b>                 |                |              |        |            |        |            |
| Mean (days)                            | 278.4          | 277.3        | 0.002  | 277.1      | 0.006  | 277.1      |
| <b>Birth weight</b>                    |                |              |        |            |        |            |
| Mean (grams)                           | 3414.4         | 3381.2       | 0.019  | 3363.5     | 0.004  | 3414.4     |
| <b>Body Mass Index</b>                 |                |              |        |            |        |            |
| >30 kg/m <sup>2</sup> (form 2006)      | 60 232 (23.9)  | 508 (24.6)   | 0.001  | 291 (24.5) | 0.056  | 217 (23.9) |
| <b>Smoking</b>                         |                |              |        |            |        |            |
| Yes                                    | 27 898 (12.6)  | 322 (18.1)   | <0.001 | 215 (19.6) | <0.001 | 107 (12.6) |
| <b>Preexisting disease</b>             |                |              |        |            |        |            |
| Hypertension, Kidney Disease, Diabetes | 4 117 (1.9)    | 59 (3.3)     | <0.001 | 31 (2.8)   | 0.02   | 28 (1.9)   |
| <b>Folic acid supplementation</b>      |                |              |        |            |        |            |
| Before pregnancy                       | 55 168 (24.9)  | 563 (33.4)   | <0.001 | 303 (27.6) | 0.038  | 290 (24.9) |
| During pregnancy                       | 139 157 (62.8) | 1 266 (71.2) | <0.001 | 723 (66.0) | 0.031  | 543 (62.8) |
| High dose                              | 2174 (1.0)     | 362 (20.4)   | <0.001 | 27 (2.5)   | <0.001 | 312 (1.0)  |

WWE = Women with Epilepsy

AED = Antiepileptic Drug

The adjusted odds ratio (aOR) of the compound variable any hypertensive disorder was increased in WWE (aOR 1.2, 95% CI: 1.0-1.5) compared to women without epilepsy.

However, the occurrence of any hypertensive disorder in neither the group WWE with AED nor the group WWE without AED differed significantly from women without epilepsy when examined separately.

The majority of hypertensive complications were mild preeclampsia (Table 2).

**Table 2. Hypertensive pregnancy complications in WWE, WWE with and without AED.**

| N = 223440 | Women without Epilepsy |       | WWE          |           | WWE without AED |              |
|------------|------------------------|-------|--------------|-----------|-----------------|--------------|
|            | N (%)                  | N (%) | aOR (95% CI) | p - value | N (%)           | aOR (95% CI) |
|            | N= 221662              |       | N= 1778      |           | N= 1096         |              |

## Hypertensive pregnancy complications in women with epilepsy

|                                  |             |           |                   |       |          |                    |
|----------------------------------|-------------|-----------|-------------------|-------|----------|--------------------|
| <b>Any Hypertensive Disorder</b> | 16542 (7.5) | 158 (8.9) | 1.23(1.03-1.48)*  | 0.022 | 93 (8.5) | 1.21(0.96-1.53)    |
| <b>Gestational Hypertension</b>  | 5381 (2.4)  | 43 (2.4)  | 1.04(0.75-1.45)   | 0.817 | 22 (2.0) | 0.90(0.57-1.43)    |
| <b>Mild Preeclampsia</b>         | 6445 (2.9)  | 68 (3.8)  | 1.42 (1.10-1.84)  | 0.007 | 42 (3.8) | 1.44(1.04-2.00)*** |
| <b>Severe Preeclampsia</b>       | 4330 (1.9)  | 46 (2.6)  | 1.30(0.97-1.75)   | 0.081 | 29 (2.6) | 1.32(0.91-1.92)    |
| <b>Early Onset Preeclampsia</b>  | 1299 (0.6)  | 19 (1.1)  | 1.69(1.01-2.82)** | 0.047 | 11 (1.0) | 1.67(0.86-3.23)    |
| <b>HELLP</b>                     | 518 (0.2)   | 6 (0.3)   | 1.18(0.44-3.17)   | 0.743 | 2 (0.2)  | 0.97(0.24-3.91)    |
| <b>Eclampsia</b>                 | 191 (0.1)   | 3 (0.2)   | 2.18(0.69-6.84)   | 0.183 | 2 (0.2)  | 2.35(0.58-9.49)    |

WWE = Women with Epilepsy

AED = Antiepileptic Drug

aOR = Adjusted Odds Ratio (Adjusted for maternal age, Educational level, Multifetal pregnancy, Other relevant chronic disease, Folic acid supplementation)

95% CI = 95% Confidence Interval

\*Not significant in sensitivity analyses when including BMI >30kg/m<sup>2</sup>

\*\*Not significant in sensitivity analyses when including smoking, BMI >30kg/m<sup>2</sup>, or other relevant diseases

\*\*\* Not significant in sensitivity analyses when including other relevant diseases

The risk of mild preeclampsia was significantly increased in WWE (aOR: 1.4, 95% CI: 1.1-1.8) and in WWE without AED exposure (aOR: 1.4, 95% CI: 1.0-2.0) compared to women without epilepsy. For WWE with AED the risk of mild preeclampsia was not significantly increased although the prevalence was the same as for both WWE and WWE without AEDs. For WWE there was a marginally significant risk of early onset preeclampsia (aOR: 1.7, 95% CI: 1.0-2.8). This risk disappeared after stratification and when including smoking or other relevant chronic diseases in sensitivity analyses. Mild preeclampsia was therefore the only specified hypertensive disorder increased in WWE. There was no significant difference for any of the outcomes when WWE with AEDs were compared to WWE without AED. There was no significantly increased risk of gestational hypertension, severe preeclampsia, HELLP or eclampsia when WWE, WWE with and WWE without AED were compared to women without epilepsy.

WWE with valproate monotherapy had an increased risk of any hypertensive complication (aOR: 2.9, 95% CI: 1.4-6.4), gestational hypertension (aOR: 3.3, 95% CI: 1.0-10.8), and mild preeclampsia (aOR: 3.3, 95% CI: 1.2-9.4) compared to women without epilepsy (Table 3).

**Table 3. Hypertensive pregnancy complications in WWE with specified AEDs.**

## Hypertensive pregnancy complications in women with epilepsy

| N=223440                         | Women without Epilepsy | WWE with lamotrigine |                 |         | WWE with carbamazepine |                   |         | N (%)   |
|----------------------------------|------------------------|----------------------|-----------------|---------|------------------------|-------------------|---------|---------|
|                                  | N=221662               | N (%)                | aOR (95% CI)    | p-value | N (%)                  | aOR (95% CI)      | p-value |         |
|                                  |                        |                      | N=280           |         |                        | N=94              |         |         |
|                                  | N (%)                  | N (%)                | aOR (95% CI)    | p-value | N (%)                  | aOR (95% CI)      | p-value | N (%)   |
| <b>Any Hypertensive Disorder</b> | 16542 (7.5)            | 25 (8.9)             | 1.20(0.76-1.88) | 0.434   | 7 (7.4)                | 0.97(0.42-2.25)   | 0.946   | 7 (9.9) |
| <b>Gestational Hypertension</b>  | 5381 (2.4)             | 7 (2.5)              | 1.07(0.48-2.42) | 0.865   | 1 (1.1)                | 0.48(0.07-3.44)   | 0.462   | 2 (2.8) |
| <b>Mild Preeclampsia</b>         | 6445 (2.9)             | 11 (3.8)             | 1.41(0.75-2.66) | 0.291   | 2 (2.1)                | 0.85(0.21-3.49)   | 0.824   | 3 (4.2) |
| <b>Severe Preeclampsia</b>       | 4330 (1.9)             | 6 (2.1)              | 1.21(0.50-2.53) | 0.783   | 4 (4.3)                | 2.23(0.81-6.12)   | 0.120   | 3 (4.2) |
| <b>Early Onset Preeclampsia</b>  | 1299 (0.6)             | 3 (1.1)              | 1.45(0.36-5.87) | 0.602   | 2 (2.1)                | 4.04(0.98-16.76)  | 0.054   | 2 (2.8) |
| <b>HELLP</b>                     | 518 (0.2)              | -                    | -               | -       | 2 (2.1)                | 5.02(0.69-36-36)  | 0.11    | -       |
| <b>Eclampsia</b>                 | 191 (0.1)              | -                    | -               | -       | 1 (1.1)                | 12.47(1.73-89.91) | 0.078   | -       |

WWE = Women with Epilepsy

AED = Antiepileptic Drug

OR = Odds Ratio

aOR = Adjusted Odds Ratio (Adjusted for maternal age, Educational level, Multifetal pregnancy, Pre-existing diseases, Folic acid supplementation)

95% CI = 95% Confidence Interval

\*Not significant in sensitivity analyses when including BMI >30kg/m<sup>2</sup>

\*\*Not significant in sensitivity analyses when including smoking or BMI >30kg/m<sup>2</sup>

There was no increased risk of hypertensive complications for any other AEDs used in monotherapy.

The association between early onset preeclampsia and WWE disappeared when applying sensitivity analyses for smoking (182 478 women). Sensitivity analyses for BMI >30kg/m<sup>2</sup> included 60 740 women and the association for any hypertensive disorder disappeared for WWE, while the risk of mild preeclampsia increased (aOR: 1.8, 95% CI: 1.1-2.9). All increased risks for WWE with valproate disappeared when sensitivity analyses with BMI > 30kg/m<sup>2</sup> was performed. Separate analyses of women with BMI >30kg/m<sup>2</sup> only, showed no significant differences for any of the outcome variables when WWE, WWE with AED, and WWE without AED were compared to women without epilepsy. For women with BMI > 30kg/m<sup>2</sup>, WWE with valproate had a higher prevalence of mild preeclampsia (16.7 %) than women without epilepsy (6.7 %). This difference was not significant, but the number of cases was low. BMI > 30kg/m<sup>2</sup> and other relevant chronic diseases had no significant interactions with epilepsy in logistic regression analyses. However, these variables had more impact on all

Hypertensive pregnancy complications in women with epilepsy

hypertensive outcomes than a diagnosis of epilepsy. The impact of standard folic acid and of high-dose folic acid supplementation was examined in all population subcategories. There were no significant differences among WWE for any of the hypertensive outcomes between use and no use of such supplementations.

For peer review only

Hypertensive pregnancy complications in women with epilepsy

### Discussion

We found an increased risk of mild preeclampsia in WWE. The specified newer AEDs, lamotrigine and levetiracetam, used in monotherapy did not predispose for this complication. Use of valproate monotherapy was significantly associated with mild preeclampsia, in contrast to other AEDs. WWE, with and without AEDs, did not have an increased risk of gestational hypertension, severe preeclampsia, early onset preeclampsia, HELLP or eclampsia when compared to women without epilepsy.

The present study shows that most WWE, and in particular when treated with the newer AEDs, do not develop hypertensive complications. WWE with AED had comparable prevalence of mild preeclampsia to WWE without AED, but did not reach significance. This probably reflects marginal differences influenced by sample size. Cardiovascular risk factors (smoking, BMI > 30kg/m<sup>2</sup>, pre-existing kidney disease, hypertension and diabetes) were relevant for hypertensive complications in WWE. The mechanism for the increased risk of hypertensive complications in WWE in first pregnancies could therefore be partly mediated by modifiable external risk factors and comorbidity.

The specific risk in WWE on valproate was linked to high BMI. Weight gain and metabolic syndrome represent side-effects of valproate.<sup>(16)</sup> Our study does not support any additional mechanism for valproate associated mild preeclampsia. When pregnancies with BMI > 30 kg/m<sup>2</sup> were analysed separately, WWE with valproate had a high prevalence of mild preeclampsia, but the increased risk was not significant, possibly due to few cases. A previous study showed increased risk of preeclampsia in women on valproate but this was not confirmed by later studies.<sup>(3, 12, 13)</sup> Valproate can induce endocrine changes and polycystic ovary syndrome in WWE and polycystic ovary syndrome is associated with hypertensive pregnancy complications.<sup>(16, 20-22)</sup> Polycystic ovary syndrome is also associated with overweight so endocrine factors could be important for our findings. Valproate increases the

Hypertensive pregnancy complications in women with epilepsy

1  
2  
3 risk of malformations in children exposed during pregnancy.<sup>(6, 23)</sup> Because of this, as well as  
4  
5 delayed neurodevelopment, The European Medicines Agency has strengthened the advice not  
6  
7 to prescribe valproate to WWE in fertile age.<sup>(24)</sup> Valproate is therefore not first line treatment  
8  
9 in pregnancy. The observed valproate associated mild preeclampsia could represent bias  
10  
11 through confounding by indication, although we would expect valproate to be avoided in  
12  
13 women without other risk factors than epilepsy.  
14

15  
16 The newer AEDs, lamotrigine and levetiracetam, were not associated with increased risk of  
17  
18 mild preeclampsia, and lamotrigine did not increase hypertensive pregnancy complications in  
19  
20 general. A small study has previously reported an increased risk of preeclampsia in WWE on  
21  
22 lamotrigine.<sup>(3)</sup> Lamotrigine has been considered a preferred option for WWE in need of AED  
23  
24 treatment because children exposed to lamotrigine in pregnancy have a lower rate of  
25  
26 malformations and better cognitive function than after exposure to other AEDs.<sup>(5, 6, 8)</sup> The  
27  
28 combination of a low rate of adverse fetal effects and no increased risk of hypertensive  
29  
30 complications supports the use of lamotrigine in WWE before and during pregnancy.  
31

32  
33 Levetiracetam is a potent, broad-spectrum AED with low rate of adverse fetal outcomes.<sup>(5)</sup>  
34  
35 Levetiracetam use among pregnant WWE is increasing, but levetiracetam is less studied than  
36  
37 lamotrigine and maternal safety during pregnancy is not well documented.<sup>(5, 6, 25)</sup> To our  
38  
39 knowledge, there are no previous studies on hypertensive complications in WWE with  
40  
41 levetiracetam in pregnancy.  
42

43  
44 Mild, but not more severe preeclampsia was increased among WWE. Proactive management  
45  
46 and close surveillance of WWE could explain why the mild disease did not progress further.  
47  
48 Similarly, the close surveillance of WWE could have increased the detection of mild  
49  
50 preeclampsia. Ascertainment bias may have influenced other outcomes as well. Alternatively,  
51  
52 mild and severe hypertensive complications in pregnancies could have different underlying  
53  
54 pathophysiological mechanisms in WWE.  
55

## Hypertensive pregnancy complications in women with epilepsy

1  
2  
3 Strengths of our study are that we have analysed first pregnancies only, have specified the  
4 types of hypertensive complications, and have analysed WWE on specific AEDs in  
5 monotherapy only. Parity is a complex variable in reproductive epidemiology and may lead to  
6 bias as the risk of hypertensive complications changes significantly in subsequent  
7 pregnancies.<sup>(26-28)</sup> Our large and unselected nationwide cohort enabled assessment of effects  
8 of individual AEDs in monotherapy. Data was linked to the NorPD that showed the exact  
9 drug dispensation during pregnancy. The registration and standardized data collection in the  
10 national databases that were used provide information of high validity and include important  
11 possible confounders for hypertensive disorders.<sup>(3, 29)</sup> The prevalence of WWE in our  
12 population was 0.79 % and the incidence of preeclampsia was 5.4 %, both in accordance with  
13 previous population-based studies.<sup>(1, 2, 4, 14, 30, 31)</sup>

14  
15 A limitation of this study was the possible inclusion of previous and non-active epilepsy, and  
16 also of women with undefined seizures in the epilepsy group. This could have increased the  
17 total epilepsy population and thereby masking some effects in our group with untreated  
18 epilepsy. The MBRN did not provide data on type of epilepsy or seizure activity. However, a  
19 small study did not find any association between seizure activity and hypertensive  
20 complications in pregnancy.<sup>(3)</sup> Women without epilepsy but using AEDs for other conditions  
21 were not excluded in our study. This group constituted 0.1 % in the control population and did  
22 not affect the outcomes. Psychiatric and pain conditions are the main reasons for AED use in  
23 women without epilepsy. NorPD records dispensed medications which may leave room for  
24 variation in actual compliance. As 95% of WWE with AED collected more than one  
25 dispensation during their pregnancy, we presume that the patients used their AED as  
26 prescribed.

27  
28 BMI above or below 30 kg/m<sup>2</sup> influenced the results for WWE. MBRN has only registered  
29 BMI since 2006, thus it was not possible to control for this variable in the complete

## Hypertensive pregnancy complications in women with epilepsy

1  
2  
3 population. A previous study has indicated an increased risk for preeclampsia in WWE with  
4 BMI > 25 kg/m<sup>2</sup>.<sup>(32)</sup> High BMI represents a risk factor for hypertensive disorders and there is a  
5 global rise in BMI in young women.<sup>(33)</sup> However, a previous study on MBRN data has shown  
6 a slight decrease of preeclampsia in the time period for our study.<sup>(30)</sup> A decrease in  
7 preeclampsia is most likely also affecting WWE and thereby possibly narrowing the  
8 differences between WWE and women without epilepsy.  
9  
10  
11  
12  
13  
14

15 HELLP, eclampsia and early onset preeclampsia are rare hypertensive manifestations. Lack of  
16 events in some of our subgroups can be insufficient to prove significance, despite our large  
17 sample size. Differences in statistical outcome across treatment subcategories for WWE can  
18 similarly have been influenced by sample size. Our study lacks information on ethnicity and  
19 marital status, not released by MBRN due to ethical considerations.  
20  
21  
22  
23  
24  
25  
26  
27  
28  
29  
30  
31  
32  
33  
34  
35  
36  
37  
38  
39  
40  
41  
42  
43  
44  
45  
46  
47  
48  
49  
50  
51  
52  
53  
54  
55  
56  
57  
58  
59  
60



Hypertensive pregnancy complications in women with epilepsy

### **Conclusion**

Mild preeclampsia was the only hypertensive complication to be increased in first pregnancies of WWE. This is of clinical importance for WWE since mild preeclampsia, in contrast to severe forms of preeclampsia, is not associated with increased maternal or fetal morbidity or mortality in pregnancy.<sup>(19)</sup> WWE have previously been considered as high risk parturients by having a significant increase in several adverse pregnancy outcomes, including hypertensive complications.<sup>(2,3,10,11)</sup> Our study shows that most WWE do not develop hypertensive complications. WWE on the newer AEDs, lamotrigine and levetiracetam in particular, do not have an additional risk for severe hypertensive complications. A healthcare system focusing on risk assessment, prevention of modifiable risk factors and modern treatment options should be the key to a further decrease in hypertensive complications in pregnant WWE.

### **Acknowledgement:**

This research was kindly supported by the Fund of Torbjørg Hauge's Legacy. We are grateful for data provision and linkage that was performed by Medical Birth Registry of Norway, Norwegian Prescription Database and Statistics Norway.

### **Details of Ethics Approval:**

This study was approved by the Regional Ethics Committee (REK 2013/186) and the Norwegian Data Protection Authority. The MBRN, NorPD and Statistics Norway approved the use of data. Use of Norwegian national register data does not require consent from the participants.

### **Contribution to Authorship:**

KCD conceived and designed the study, analysed the data and drafted the manuscript. IB provided input on design, interpretation and presentation of the study. NHM provided input on design and analyses, interpretation of analyses and critically revised the manuscript. NEG

Hypertensive pregnancy complications in women with epilepsy

conceived and designed the study, and critically revised the presentation and discussion of the results in the manuscript. The final manuscript was approved by all authors.

**Data sharing statement:**

Data from Medical Birth Registry of Norway and Norwegian Prescription Database are available at Norwegian Institute of Public Health.

For peer review only

## Hypertensive pregnancy complications in women with epilepsy

## REFERENCES

1. Artama M, Gissler M, Malm H, Ritvanen A, Drug, Pregnancy G. Effects of maternal epilepsy and antiepileptic drug use during pregnancy on perinatal health in offspring: nationwide, retrospective cohort study in Finland. *Drug safety*. 2013;36(5):359-69.
2. Borthen I, Eide MG, Veiby G, Daltveit AK, Gilhus NE. Complications during pregnancy in women with epilepsy: population-based cohort study. *BJOG : an international journal of obstetrics and gynaecology*. 2009;116(13):1736-42.
3. Borthen I, Eide MG, Daltveit AK, Gilhus NE. Obstetric outcome in women with epilepsy: a hospital-based, retrospective study. *BJOG : an international journal of obstetrics and gynaecology*. 2011;118(8):956-65.
4. Richmond JR, Krishnamoorthy P, Andermann E, Benjamin A. Epilepsy and pregnancy: an obstetric perspective. *American journal of obstetrics and gynecology*. 2004;190(2):371-9.
5. Weston J, Bromley R, Jackson CF, Adab N, Clayton-Smith J, Greenhalgh J, et al. Monotherapy treatment of epilepsy in pregnancy: congenital malformation outcomes in the child. *The Cochrane database of systematic reviews*. 2016;11:CD010224.
6. Bromley R, Weston J, Adab N, Greenhalgh J, Sanniti A, McKay AJ, et al. Treatment for epilepsy in pregnancy: neurodevelopmental outcomes in the child. *The Cochrane database of systematic reviews*. 2014(10):CD010236.
7. Gerard EE, Meador KJ. Managing Epilepsy in Women. *Continuum*. 2016;22(1 Epilepsy):204-26.
8. Tomson T, Xue H, Battino D. Major congenital malformations in children of women with epilepsy. *Seizure : the journal of the British Epilepsy Association*. 2015;28:46-50.
9. Say L, Chou D, Gemmill A, Tuncalp O, Moller AB, Daniels J, et al. Global causes of maternal death: a WHO systematic analysis. *The Lancet Global health*. 2014;2(6):e323-33.
10. MacDonald SC, Bateman BT, McElrath TF, Hernandez-Diaz S. Mortality and Morbidity During Delivery Hospitalization Among Pregnant Women With Epilepsy in the United States. *JAMA neurology*. 2015;72(9):981-8.
11. Viale L, Allotey J, Cheong-See F, Arroyo-Manzano D, McCorry D, Bagary M, et al. Epilepsy in pregnancy and reproductive outcomes: a systematic review and meta-analysis. *Lancet*. 2015.
12. Veiby G, Daltveit AK, Engelsen BA, Gilhus NE. Pregnancy, delivery, and outcome for the child in maternal epilepsy. *Epilepsia*. 2009;50(9):2130-9.
13. Pilo C, Wide K, Winbladh B. Pregnancy, delivery, and neonatal complications after treatment with antiepileptic drugs. *Acta obstetrica et gynecologica Scandinavica*. 2006;85(6):643-6.
14. Viinikainen K, Heinonen S, Eriksson K, Kalviainen R. Community-based, prospective, controlled study of obstetric and neonatal outcome of 179 pregnancies in women with epilepsy. *Epilepsia*. 2006;47(1):186-92.
15. Razaz N, Tomson T, Wikstrom AK, Cnattingius S. Association Between Pregnancy and Perinatal Outcomes Among Women With Epilepsy. *JAMA neurology*. 2017;74(8):983-91.
16. Belcastro V, D'Egidio C, Striano P, Verrotti A. Metabolic and endocrine effects of valproic acid chronic treatment. *Epilepsy research*. 2013;107(1-2):1-8.
17. Vajda FJ, O'Brien T, Lander C, Graham J, Eadie M. The efficacy of the newer antiepileptic drugs in controlling seizures in pregnancy. *Epilepsia*. 2014;55(8):1229-34.
18. Nicholas JM, Ridsdale L, Richardson MP, Ashworth M, Gulliford MC. Trends in antiepileptic drug utilisation in UK primary care 1993-2008: cohort study using the General

## Hypertensive pregnancy complications in women with epilepsy

- Practice Research Database. *Seizure : the journal of the British Epilepsy Association*. 2012;21(6):466-70.
19. Hypertension in pregnancy. Report of the American College of Obstetricians and Gynecologists' Task Force on Hypertension in Pregnancy. *Obstetrics and gynecology*. 2013;122(5):1122-31.
20. Hu X, Wang J, Dong W, Fang Q, Hu L, Liu C. A meta-analysis of polycystic ovary syndrome in women taking valproate for epilepsy. *Epilepsy research*. 2011;97(1-2):73-82.
21. Qin JZ, Pang LH, Li MJ, Fan XJ, Huang RD, Chen HY. Obstetric complications in women with polycystic ovary syndrome: a systematic review and meta-analysis. *Reproductive biology and endocrinology : RB&E*. 2013;11:56.
22. Isojarvi JI, Laatikainen TJ, Pakarinen AJ, Juntunen KT, Myllyla VV. Polycystic ovaries and hyperandrogenism in women taking valproate for epilepsy. *The New England journal of medicine*. 1993;329(19):1383-8.
23. Tomson T, Battino D, Bonizzoni E, Craig J, Lindhout D, Sabers A, et al. Dose-dependent risk of malformations with antiepileptic drugs: an analysis of data from the EURAP epilepsy and pregnancy registry. *Lancet neurology*. 2011;10(7):609-17.
24. Agency EM. CMDh agrees to strengthen warnings on the use of valproate medicines in women and girls: European Medicines Agency; 2014 [cited 2017]. Available from: [http://www.ema.europa.eu/ema/index.jsp?curl=pages/news\\_and\\_events/news/2014/11/news\\_detail\\_002220.jsp&mid=WC0b01ac058004d5c1](http://www.ema.europa.eu/ema/index.jsp?curl=pages/news_and_events/news/2014/11/news_detail_002220.jsp&mid=WC0b01ac058004d5c1).
25. Eurap Study G. Utilization of antiepileptic drugs during pregnancy: comparative patterns in 38 countries based on data from the EURAP registry. *Epilepsia*. 2009;50(10):2305-9.
26. Wilcox AJ. *Fertility and Pregnancy : An Epidemiologic Perspective*. Oxford: Oxford University Press, USA; 2010.
27. Ebbing C, Rasmussen S, Skjaerven R, Irgens LM. Risk factors for recurrence of hypertensive disorders of pregnancy, a population-based cohort study. *Acta obstetrica et gynecologica Scandinavica*. 2017;96(2):243-50.
28. Hernandez-Diaz S, Toh S, Cnattingius S. Risk of pre-eclampsia in first and subsequent pregnancies: prospective cohort study. *Bmj*. 2009;338:b2255.
29. Thomsen LC, Klungsoyr K, Roten LT, Tappert C, Araya E, Baerheim G, et al. Validity of the diagnosis of pre-eclampsia in the Medical Birth Registry of Norway. *Acta obstetrica et gynecologica Scandinavica*. 2013.
30. Klungsoyr K, Morken NH, Irgens L, Vollset SE, Skjaerven R. Secular trends in the epidemiology of pre-eclampsia throughout 40 years in Norway: prevalence, risk factors and perinatal survival. *Paediatric and perinatal epidemiology*. 2012;26(3):190-8.
31. Abalos E, Cuesta C, Grosso AL, Chou D, Say L. Global and regional estimates of preeclampsia and eclampsia: a systematic review. *European journal of obstetrics, gynecology, and reproductive biology*. 2013;170(1):1-7.
32. Kolstad E, Veiby G, Gilhus NE, Bjork M. Overweight in epilepsy as a risk factor for pregnancy and delivery complications. *Epilepsia*. 2016;57(11):1849-57.
33. WHO. Obesity Health Topic: World Health Organization; 2017 [updated 2017; cited 2017 June 2017]. Available from: <http://www.who.int/topics/obesity/en/>.

## STROBE Statement—checklist of items that should be included in reports of observational studies

|                              | Item No. | Recommendation                                                                                                                                                                                                                                                                                                      | Page No. | Relevant text from manuscript |
|------------------------------|----------|---------------------------------------------------------------------------------------------------------------------------------------------------------------------------------------------------------------------------------------------------------------------------------------------------------------------|----------|-------------------------------|
| <b>Title and abstract</b>    | 1        | (a) Indicate the study's design with a commonly used term in the title or the abstract                                                                                                                                                                                                                              | 1        |                               |
|                              |          | (b) Provide in the abstract an informative and balanced summary of what was done and what was found                                                                                                                                                                                                                 | 2        |                               |
| <b>Introduction</b>          |          |                                                                                                                                                                                                                                                                                                                     |          |                               |
| Background/rationale         | 2        | Explain the scientific background and rationale for the investigation being reported                                                                                                                                                                                                                                | 4        |                               |
| Objectives                   | 3        | State specific objectives, including any prespecified hypotheses                                                                                                                                                                                                                                                    | 4        |                               |
| <b>Methods</b>               |          |                                                                                                                                                                                                                                                                                                                     |          |                               |
| Study design                 | 4        | Present key elements of study design early in the paper                                                                                                                                                                                                                                                             | 5        |                               |
| Setting                      | 5        | Describe the setting, locations, and relevant dates, including periods of recruitment, exposure, follow-up, and data collection                                                                                                                                                                                     | 5        |                               |
| Participants                 | 6        | (a) <i>Cohort study</i> —Give the eligibility criteria, and the sources and methods of selection of participants. Describe methods of follow-up                                                                                                                                                                     | 5        |                               |
|                              |          | <i>Case-control study</i> —Give the eligibility criteria, and the sources and methods of case ascertainment and control selection. Give the rationale for the choice of cases and controls<br><i>Cross-sectional study</i> —Give the eligibility criteria, and the sources and methods of selection of participants |          |                               |
|                              |          | (b) <i>Cohort study</i> —For matched studies, give matching criteria and number of exposed and unexposed                                                                                                                                                                                                            |          |                               |
|                              |          | <i>Case-control study</i> —For matched studies, give matching criteria and the number of controls per case                                                                                                                                                                                                          |          |                               |
| Variables                    | 7        | Clearly define all outcomes, exposures, predictors, potential confounders, and effect modifiers. Give diagnostic criteria, if applicable                                                                                                                                                                            | 5-6      |                               |
| Data sources/<br>measurement | 8*       | For each variable of interest, give sources of data and details of methods of assessment (measurement). Describe comparability of assessment methods if there is more than one group                                                                                                                                | 5-6      |                               |
| Bias                         | 9        | Describe any efforts to address potential sources of bias                                                                                                                                                                                                                                                           | 5-7      |                               |
| Study size                   | 10       | Explain how the study size was arrived at                                                                                                                                                                                                                                                                           | 4-5      |                               |

Continued on next page

|                        |     |                                                                                                                                                                                                                        |                   |
|------------------------|-----|------------------------------------------------------------------------------------------------------------------------------------------------------------------------------------------------------------------------|-------------------|
| Quantitative variables | 11  | Explain how quantitative variables were handled in the analyses. If applicable, describe which groupings were chosen and why                                                                                           | 7                 |
| Statistical methods    | 12  | (a) Describe all statistical methods, including those used to control for confounding                                                                                                                                  | 7                 |
|                        |     | (b) Describe any methods used to examine subgroups and interactions                                                                                                                                                    | 7-8               |
|                        |     | (c) Explain how missing data were addressed                                                                                                                                                                            | 8                 |
|                        |     | (d) <i>Cohort study</i> —If applicable, explain how loss to follow-up was addressed                                                                                                                                    | NA                |
|                        |     | (e) <i>Case-control study</i> —If applicable, explain how matching of cases and controls was addressed<br><i>Cross-sectional study</i> —If applicable, describe analytical methods taking account of sampling strategy | 8                 |
| <b>Results</b>         |     |                                                                                                                                                                                                                        |                   |
| Participants           | 13* | (a) Report numbers of individuals at each stage of study—eg numbers potentially eligible, examined for eligibility, confirmed eligible, included in the study, completing follow-up, and analysed                      | 9                 |
|                        |     | (b) Give reasons for non-participation at each stage                                                                                                                                                                   | NA                |
|                        |     | (c) Consider use of a flow diagram                                                                                                                                                                                     | NA                |
| Descriptive data       | 14* | (a) Give characteristics of study participants (eg demographic, clinical, social) and information on exposures and potential confounders                                                                               | 9 (Table 1)       |
|                        |     | (b) Indicate number of participants with missing data for each variable of interest                                                                                                                                    | 9 (Table 1)       |
|                        |     | (c) <i>Cohort study</i> —Summarise follow-up time (eg, average and total amount)                                                                                                                                       | NA                |
| Outcome data           | 15* | <i>Cohort study</i> —Report numbers of outcome events or summary measures over time                                                                                                                                    | 9 (Table 2 and 3) |
|                        |     | <i>Case-control study</i> —Report numbers in each exposure category, or summary measures of exposure                                                                                                                   |                   |
|                        |     | <i>Cross-sectional study</i> —Report numbers of outcome events or summary measures                                                                                                                                     |                   |
| Main results           | 16  | (a) Give unadjusted estimates and, if applicable, confounder-adjusted estimates and their precision (eg, 95% confidence interval). Make clear which confounders were adjusted for and why they were included           | (Table 2 and 3)   |
|                        |     | (b) Report category boundaries when continuous variables were categorized                                                                                                                                              | NA                |
|                        |     | (c) If relevant, consider translating estimates of relative risk into absolute risk for a meaningful time period                                                                                                       | NA                |

Continued on next page

|                          |    |                                                                                                                                                                            |    |
|--------------------------|----|----------------------------------------------------------------------------------------------------------------------------------------------------------------------------|----|
| Other analyses           | 17 | Report other analyses done—eg analyses of subgroups and interactions, and sensitivity analyses                                                                             | 10 |
| <b>Discussion</b>        |    |                                                                                                                                                                            |    |
| Key results              | 18 | Summarise key results with reference to study objectives                                                                                                                   | 12 |
| Limitations              | 19 | Discuss limitations of the study, taking into account sources of potential bias or imprecision. Discuss both direction and magnitude of any potential bias                 | 14 |
| Interpretation           | 20 | Give a cautious overall interpretation of results considering objectives, limitations, multiplicity of analyses, results from similar studies, and other relevant evidence | 16 |
| Generalisability         | 21 | Discuss the generalisability (external validity) of the study results                                                                                                      | 16 |
| <b>Other information</b> |    |                                                                                                                                                                            |    |
| Funding                  | 22 | Give the source of funding and the role of the funders for the present study and, if applicable, for the original study on which the present article is based              | 16 |

\*Give information separately for cases and controls in case-control studies and, if applicable, for exposed and unexposed groups in cohort and cross-sectional studies.

**Note:** An Explanation and Elaboration article discusses each checklist item and gives methodological background and published examples of transparent reporting. The STROBE checklist is best used in conjunction with this article (freely available on the Web sites of PLoS Medicine at <http://www.plosmedicine.org/>, Annals of Internal Medicine at <http://www.annals.org/>, and Epidemiology at <http://www.epidem.com/>). Information on the STROBE Initiative is available at [www.strobe-statement.org](http://www.strobe-statement.org).
